# Supplementary material
Source: publisher site journal article supplement (https://www.dovepress.com/get_supplementary_file.php?f=256818.xlsx)
Supplement: Supplementary file 1 [file get_supplementary_file.php]

## Sheet: Supplementary Table 1
Supplementary Table 1: The detailed lists of the significantly up- and down-regulated genes in metastasis group pre- and post-NACT
pre-NACT up-regulated				pre-NACT down-regulated				post-NACT up-regulated				post-NACT down-regulated
Entrez.ID	Name	logFC	P.value	Entrez.ID	Name	logFC	P.value	Entrez.ID	Name	logFC	P.value	Entrez.ID	Name	logFC	P.value
658	BMPR1B	4.58375	0.00212542	1959	EGR2	-1	0.0234765	9463	PICK1	2.84875	2.17e-06	1635	DCTD	-1.03	0.000280817
419	ART3	4.52375	0.015032	390649	OR4F15	-1.00125	0.00381845	84620	ST6GAL2	1.98375	8.89e-06	221060	C10orf111	-1.14375	0.000709466
2263	FGFR2	4.26	0.0393938	200150	PLD5	-1.0025	0.0154438	352954	GATS	2.11	1.68e-05	7053	TGM3	-1.02875	0.00117277
79679	VTCN1	4.20875	0.0365329	10538	BATF	-1.00375	0.0188784	56124	PCDHB12	1.66	2.65e-05	4534	MTM1	-1.0625	0.0015634
131096	KCNH8	4.01875	4.62e-06	253832	ZDHHC20	-1.005	0.00792223	81035	COLEC12	2.755	3.57e-05	1558	CYP2C8	-1.38625	0.00175656
347733	TUBB2B	3.95875	3.83e-05	10141	C4orf6	-1.0075	0.0220669	6836	SURF4	2.32375	4.1e-05	677775	SCARNA5	-1.52375	0.00272801
306	ANXA3	3.82875	0.0067798	5188	PET112	-1.00875	0.0085185	64288	ZSCAN31	2.28	8.5e-05	338339	CLEC4D	-1.12125	0.00351067
4131	MAP1B	3.82875	0.00870907	23255	MTCL1	-1.00875	0.007023	56180	MOSPD1	1.49625	9.58e-05	128025	WDR64	-1.105	0.00376321
22941	SHANK2	3.71875	0.000909436	83590	TMUB1	-1.01125	0.00732591	9069	CLDN12	3.4375	9.89e-05	64324	NSD1	-1.44375	0.00404685
4240	MFGE8	3.54875	0.00404487	84817	TXNDC17	-1.01125	0.0349407	23588	KLHDC2	1.57625	0.000101129	51703	ACSL5	-1.0825	0.00434598
26495	OR9A1P	3.54125	0.0032929	29116	MYLIP	-1.01875	0.0305265	19	ABCA1	1.4775	0.000105411	55798	METTL2B	-1.75	0.00443561
53335	BCL11A	3.50375	0.0205702	144195	SLC2A14	-1.02	0.0178975	3074	HEXB	1.80375	0.000108578	401507	FAM74A6	-1.0175	0.00479349
84951	TNS4	3.46625	0.000280366	1536	CYBB	-1.02125	0.0397765	114899	C1QTNF3	2.7475	0.000110972	344838	PAQR9	-1.06875	0.00564922
9884	LRRC37A	3.45	0.00182548	154075	SAMD3	-1.025	0.00519606	80255	SLC35F5	2.85125	0.000114339	646300	COL6A4P2	-1.01125	0.00647141
256356	GK5	3.42125	0.00541761	10682	EBP	-1.02625	0.000498444	55421	C17orf85	1.16625	0.000114705	201299	RDM1	-1.42625	0.00658795
120406	NXPE2	3.40875	3.89e-05	1038	CDR1	-1.03	0.0216101	4131	MAP1B	4.35375	0.000126066	84457	PHYHIPL	-1.0975	0.00839738
2568	GABRP	3.36125	0.00269357	7453	WARS	-1.03375	0.0373844	1356	CP	1.91125	0.000130747	8837	CFLAR	-1.02375	0.00846029
4602	MYB	3.35125	0.0394819	56977	STOX2	-1.03875	0.00172072	93663	ARHGAP18	1.91	0.000146815	9083	BPY2	-1.20125	0.00864714
55107	ANO1	3.315	0.00282223	2495	FTH1	-1.03875	0.0390324	219931	TPCN2	2.05	0.000162709	51441	YTHDF2	-1.00625	0.00941446
25776	CBY1	3.28625	1.33e-05	7461	CLIP2	-1.04375	0.029437	2966	GTF2H2	3.7625	0.000175798	9214	FAIM3	-1.01375	0.00960702
1993	ELAVL2	3.25625	0.0428623	92482	BBIP1	-1.05375	0.00688611	55471	NDUFAF7	2.5225	0.000180424	7988	ZNF212	-1.08625	0.0105114
120066	OR5P3	3.17375	4.46e-05	5771	PTPN2	-1.05875	0.000376774	57002	YAE1D1	2.47625	0.000206742	203413	CT83	-1.04375	0.0105543
2019	EN1	3.16125	0.0143707	58527	ABRACL	-1.06	0.00448811	63897	HEATR6	1.8575	0.000220895	344805	TMPRSS7	-1.37125	0.0123071
135932	TMEM139	3.1075	0.00722009	5996	RGS1	-1.0625	0.0071376	55611	OTUB1	2.06375	0.000224143	374462	PTPRQ	-1.07	0.0129163
118980	SFXN2	3.0925	0.0348375	467	ATF3	-1.0625	0.00408352	92106	OXNAD1	1.53875	0.000248847	6374	CXCL5	-1.0875	0.0133855
79608	RIC3	3.01	0.000318815	5978	REST	-1.0675	0.000741854	23262	PPIP5K2	4.53625	0.000249832	4751	NEK2	-1.01	0.0156456
84168	ANTXR1	2.98	0.0104876	9169	SCAF11	-1.0675	0.00354295	29121	CLEC2D	1.80125	0.000271242	149466	C1orf210	-1.005	0.0156696
23262	PPIP5K2	2.96	0.0223246	11190	CEP250	-1.07125	0.000486015	9530	BAG4	2.9375	0.000271399	2001	ELF5	-1.15	0.0157126
22839	DLGAP4	2.95625	0.0447299	5818	PVRL1	-1.07375	0.015672	730394	GTF2H2C_2	2.61	0.000307925	56252	YLPM1	-1.78875	0.0161312
89797	NAV2	2.9475	0.00232545	25816	TNFAIP8	-1.075	0.0422428	79815	NIPAL2	4.22625	0.000310895	4939	OAS2	-1.1175	0.0162773
57730	ANKRD36B	2.915	8.51e-05	9452	ITM2A	-1.075	0.00778086	54841	BIVM	1.90125	0.000312706	7365	UGT2B10	-1.13375	0.0175688
1131	CHRM3	2.88375	0.027766	223082	ZNRF2	-1.07625	0.028367	80336	PABPC1L	1.23125	0.000347872	84263	HSDL2	-1.21	0.0184067
4916	NTRK3	2.86	0.0033759	3587	IL10RA	-1.08125	0.0163509	54987	C1orf123	1.11625	0.000359142	9122	SLC16A4	-1.1475	0.0184612
27303	RBMS3	2.83125	0.0339302	644759	TMPRSS11GP	-1.095	0.00810016	8759	ADAM1A	1.465	0.000359348	10896	OCLM	-1.61125	0.019069
55917	CTTNBP2NL	2.8275	0.0240376	7494	XBP1	-1.095	0.0164203	9167	COX7A2L	2.52	0.000359903	254786	OR6C3	-1.14625	0.0197455
84928	TMEM209	2.8225	0.00396215	8991	SELENBP1	-1.1	0.0203749	122830	NAA30	2.295	0.000365168	404220	C6orf201	-1.0925	0.0199575
23236	PLCB1	2.81125	0.0108887	23178	PASK	-1.105	0.00235526	254863	TMEM256	1.51	0.000369601	56663	VTRNA1-2	-4.21	0.0205163
26137	ZBTB20	2.805	0.00323081	51703	ACSL5	-1.1075	0.00500195	55593	OTUD5	2.16125	0.000433656	692149	SCARNA14	-1.32125	0.0222277
5000	ORC4	2.80375	0.00236192	6355	CCL8	-1.1075	0.0322412	64770	CCDC14	2.735	0.000452531	23243	ANKRD28	-1.15375	0.0237769
11060	WWP2	2.8	0.00135606	8368	HIST1H4L	-1.1175	0.0426047	84962	AJUBA	2.3375	0.000479759	55900	ZNF302	-1.3875	0.0255639
4781	NFIB	2.76875	0.0486358	6713	SQLE	-1.125	0.0252541	57213	SPRYD7	1.54625	0.000500687	132203	SNTN	-1.025	0.0268289
55757	UGGT2	2.74875	0.0455659	10465	PPIH	-1.12625	0.0280045	2060	EPS15	1.59875	0.000504625	442038	SULT1C3	-1.84375	0.0270427
57717	PCDHB16	2.74	0.00312635	100170228	SNAR-G2	-1.13375	0.025853	63874	ABHD4	1.3875	0.000513831	28786	IGLV4-3	-1.17625	0.0273873
64764	CREB3L2	2.73	0.000358728	27285	TEKT2	-1.13625	0.011966	9948	WDR1	1.09125	0.00053162	28671	TRAV13-1	-1.2575	0.0288635
23233	EXOC6B	2.68	9.64e-05	84448	ABLIM2	-1.13875	6.28e-05	6717	SRI	2.405	0.000539121	728911	CT45A2	-1.625	0.0291773
2026	ENO2	2.675	1.97e-05	55256	ADI1	-1.14375	0.037297	57630	SH3RF1	1.10625	0.000563797	29974	A1CF	-1.01	0.0299778
130872	AHSA2	2.665	0.0221726	5083	PAX9	-1.15	0.013677	27236	ARFIP1	1.91875	0.000573133	84179	MFSD7	-1.12875	0.0329851
22941	SHANK2	2.65375	0.000320578	2966	GTF2H2	-1.1575	0.0143821	347273	MURC	1.78375	0.000577128	4001	LMNB1	-1.12875	0.0359051
2195	FAT1	2.64875	0.0280799	10826	FAXDC2	-1.15875	0.0225554	57722	IGDCC4	1.505	0.000598879	84296	GINS4	-1.32375	0.0364333
3480	IGF1R	2.64	0.00546073	55303	GIMAP4	-1.16625	0.0172855	441295	OR2A9P	3.1625	0.000629855	337873	HIST2H2BC	-1.1175	0.0387064
11183	MAP4K5	2.6275	0.0190155	79145	CHCHD7	-1.17875	0.0457682	57336	ZNF287	1.39	0.000634424	3150	HMGN1	-1.05375	0.0403116
51747	LUC7L3	2.61375	0.00816329	7047	TGM4	-1.18625	0.0192049	7220	TRPC1	1.6675	0.000639246	64422	ATG3	-1.55125	0.0409505
1462	VCAN	2.595	0.0197359	115350	FCRL1	-1.1925	0.00139984	56946	C11orf30	1.41125	0.000666479	116285	ACSM1	-1.43375	0.0410618
1195	CLK1	2.5775	0.0159764	23024	PDZRN3	-1.195	0.00181825	138151	NACC2	1.01125	0.000672271	127253	TYW3	-1.0325	0.0419274
284654	RSPO1	2.5725	7.14e-06	8542	APOL1	-1.21125	0.0235627	728239	MAGED4	2.4475	0.000695329	150094	SIK1	-1.18875	0.0429026
2199	FBLN2	2.55375	0.0106211	6920	TCEA3	-1.24375	0.00420078	55757	UGGT2	3.49625	0.000719687	9797	TATDN2	-1.10375	0.0429729
130271	PLEKHH2	2.55125	0.0314997	8935	IGHV4-34	-1.2475	0.0351124	79175	ZNF343	1.4925	0.000745545	57172	CAMK1G	-1.02	0.043349
22978	NT5C2	2.5275	0.00401706	81552	VOPP1	-1.25125	0.0375417	54891	INO80D	2.16625	0.00076781	259266	ASPM	-1.05375	0.0451351
728640	FAM133CP	2.52625	0.00378816	79072	FASTKD3	-1.25875	0.0149801	23306	TMEM194A	2.94875	0.000768122	2907	GRINA	-1.03	0.0476846
26022	TMEM98	2.5175	0.0135192	26834	RNU4-2	-1.26375	0.0350268	6575	SLC20A2	2.51	0.000771368	653247	PRB2	-1.325	0.0483633
59	ACTA2	2.5075	0.00522698	100170219	SNAR-C4	-1.27125	0.00641734	4882	NPR2	2.03625	0.000778134	60313	GPBP1L1	-1.00875	0.0486247
54476	RNF216	2.4925	0.027509	399	RHOH	-1.27375	0.0214256	9270	ITGB1BP1	2.71	0.000790893	9128	PRPF4	-1.545	0.0494125
474170	LRRC37A2	2.45875	0.0197926	100170226	SNAR-C3	-1.27875	0.000857931	119391	GSTO2	1.95	0.000819481
64753	CCDC136	2.45	0.0339498	28396	IGHV4-31	-1.2925	0.0236425	977	CD151	1.43375	0.000825292
5379	PMS2P1	2.44375	0.018451	501	ALDH7A1	-1.3025	0.000572204	57631	LRCH2	1.1075	0.000939778
100134938	UPK3BL	2.4425	0.0023154	5341	PLEK	-1.30625	0.0407094	5607	MAP2K5	2.2325	0.000991529
22866	CNKSR2	2.4425	0.0386978	56169	GSDMC	-1.31125	0.0479828	25776	CBY1	2.9575	0.00101507
9419	CRIPT	2.4325	0.0180498	713	C1QB	-1.31375	0.0228662	9522	SCAMP1	2.35875	0.00106308
728239	MAGED4	2.43	0.00710181	54504	CPVL	-1.31875	0.0455997	658	BMPR1B	3.9	0.00106988
11030	RBPMS	2.42125	0.0402184	54108	CHRAC1	-1.31875	0.0168406	25915	NDUFAF3	1.5925	0.00109833
54558	SPATA6	2.40375	0.0291867	51022	GLRX2	-1.33625	0.0292664	54876	DCAF16	2.50625	0.00110127
50832	TAS2R4	2.39625	0.00121632	92140	MTDH	-1.33875	0.0121935	55756	INTS9	1.99125	0.00114112
901	CCNG2	2.39375	0.00315106	10174	SORBS3	-1.355	0.000435819	6018	RLF	1.57	0.0011507
54014	BRWD1	2.39375	0.0208383	27329	ANGPTL3	-1.36	0.0251065	55589	BMP2K	1.28125	0.0012236
5805	PTS	2.37875	0.000146667	217	ALDH2	-1.3675	0.0272268	9913	SUPT7L	1.31125	0.00127807
5308	PITX2	2.35625	0.0109777	729020	RPEL1	-1.38125	0.0079535	5351	PLOD1	1.2125	0.00128086
79752	ZFAND1	2.35125	0.0417465	22949	PTGR1	-1.3925	0.00589413	6039	RNASE6	1.34125	0.00129587
286097	MICU3	2.33875	0.00325853	23566	LPAR3	-1.4075	0.0262038	4071	TM4SF1	4.34625	0.00135999
6690	SPINK1	2.33625	0.00929161	57415	C3orf14	-1.45125	0.0245401	4685	NCAM2	2.35125	0.00136951
686	BTD	2.3275	0.00714925	3662	IRF4	-1.46625	0.0335093	64859	NABP1	2.055	0.00138642
23499	MACF1	2.325	0.0164574	54830	NUP62CL	-1.5	0.00521788	6608	SMO	1.22625	0.0014375
120065	OR5P2	2.325	1.38e-05	2729	GCLC	-1.50125	0.00170431	11341	SCRG1	2.98375	0.00146632
6421	SFPQ	2.31875	0.0406073	8110	DPF3	-1.50125	0.000131382	124995	MRPL10	1.45375	0.00151682
23229	ARHGEF9	2.3175	0.0295306	9582	APOBEC3B	-1.5075	0.0312852	3347	HTN3	1.37875	0.00151831
5380	PMS2L2	2.31125	0.0111991	4907	NT5E	-1.51875	0.00049405	22795	NID2	1.7	0.00152826
80975	TMPRSS5	2.3075	0.0033853	79772	MCTP1	-1.5275	0.0379196	4489	MT1A	1.07	0.00155249
80205	CHD9	2.29625	0.0255916	27315	PGAP2	-1.545	0.0450387	5376	PMP22	3.0425	0.00156819
54808	DYM	2.29375	0.0447166	171586	ABHD3	-1.545	0.0465482	1368	CPM	2.34375	0.00159532
4501	MT1X	2.27875	0.0253182	3694	ITGB6	-1.54875	0.044926	55696	RBM22	2.32375	0.00166684
1503	CTPS1	2.2725	0.00280297	50484	RRM2B	-1.58	0.0177264	7158	TP53BP1	2.165	0.00166853
55904	KMT2E	2.26125	0.00161657	9111	NMI	-1.58375	0.00430519	4891	SLC11A2	1.7475	0.00167271
222389	BEND7	2.235	0.0202192	9861	PSMD6	-1.5975	0.0413144	10092	ARPC5	1.30875	0.00167971
1106	CHD2	2.235	0.0123663	440957	SMIM4	-1.59875	0.0345361	51528	JKAMP	2.09875	0.00168018
56256	SERTAD4	2.23	0.0195624	2289	FKBP5	-1.6075	0.0381694	79991	OBFC1	1.02375	0.00172188
100129387	GABPB1-AS1	2.23	0.0241856	28442	IGHV3-23	-1.61	0.0395397	23362	PSD3	1.85375	0.00173084
51111	SUV420H1	2.215	0.0430873	1545	CYP1B1	-1.635	0.0125133	64400	AKTIP	1.18125	0.00176266
728963	RPS15AP10	2.19625	0.000809208	1191	CLU	-1.64375	0.0162277	1783	DYNC1LI2	1.88375	0.00178541
222663	SCUBE3	2.1875	0.00113516	3106	HLA-B	-1.64875	0.0252391	55076	TMEM45A	1.66875	0.00182073
169792	GLIS3	2.185	0.00510467	100170217	SNAR-B2	-1.64875	6.18e-05	338692	ANKRD13D	1.17875	0.00185399
119391	GSTO2	2.17375	0.0133697	26157	GIMAP2	-1.65375	0.00290121	195827	AAED1	4.1225	0.00191211
25984	KRT23	2.15875	0.0225667	201595	STT3B	-1.68125	0.00217829	10007	GNPDA1	1.13375	0.00191403
23341	DNAJC16	2.155	0.0164416	388962	BOLA3	-1.68625	0.0405914	10425	ARIH2	4.92125	0.00196745
657	BMPR1A	2.155	0.0060816	2254	FGF9	-1.70625	0.00239464	26495	OR9A1P	3.25875	0.0019678
1783	DYNC1LI2	2.155	0.00219028	3109	HLA-DMB	-1.71125	0.0173544	51309	ARMCX1	1.49625	0.00202785
474170	LRRC37A2	2.15	0.00178728	60496	AASDHPPT	-1.74125	0.0340823	9240	PNMA1	1.41	0.00204896
659	BMPR2	2.145	0.0395107	3507	IGHM	-1.74625	0.00960085	90826	PRMT9	1.93125	0.00213143
138881	OR1L8	2.14375	0.0302753	5090	PBX3	-1.75625	0.0163183	79903	NAA60	1.99125	0.0022185
28232	SLCO3A1	2.1425	0.0183854	7264	TSTA3	-1.75875	0.0265461	643792	LOC643792	1.14625	0.00224544
81035	COLEC12	2.13875	0.0126052	54900	LAX1	-1.7825	0.00489626	10969	EBNA1BP2	2.19125	0.00228692
7280	TUBB2A	2.1325	0.000282225	28426	IGHV3-43	-1.8125	0.000863413	284098	PIGW	2.35375	0.002301
55607	PPP1R9A	2.08125	0.0429926	3561	IL2RG	-1.8425	6.14e-05	7029	TFDP2	3.05375	0.00232287
4323	MMP14	2.07625	0.0015169	8345	HIST1H2BH	-1.8625	0.0374517	10073	SNUPN	1.0025	0.00233949
646962	HRCT1	2.075	0.0186376	54855	FAM46C	-1.87625	0.00805378	57414	RHBDD2	1.42875	0.00237416
4784	NFIX	2.07125	0.0210184	33	ACADL	-1.92875	0.000824522	4232	MEST	1.79	0.00246487
55777	MBD5	2.06875	0.00111777	5880	RAC2	-2.04	0.0131449	79625	NDNF	4.10625	0.00252235
10915	TCERG1	2.06875	0.0480695	8503	PIK3R3	-2.07	0.00316773	2199	FBLN2	2.35	0.00258443
7738	ZNF184	2.0675	0.00588655	6500	SKP1	-2.115	0.0346626	9528	TMEM59	2.08125	0.00258481
3918	LAMC2	2.06625	0.00692825	11040	PIM2	-2.19375	0.00564969	767811	H2BFXP	1.8225	0.00263068
51776	ZAK	2.06625	1.42e-05	55843	ARHGAP15	-2.24375	0.0252547	152100	CMC1	2.07375	0.00264045
165	AEBP1	2.065	0.000492433	4069	LYZ	-2.52625	0.0473507	23446	SLC44A1	1.22875	0.0027622
114899	C1QTNF3	2.06	0.0263777	1493	CTLA4	-2.585	0.000315208	1462	VCAN	2.6525	0.00278251
23091	ZC3H13	2.05375	0.0115506	5788	PTPRC	-2.7025	0.01419	5412	UBL3	2.4125	0.00278355
151050	KANSL1L	2.0375	0.0241402	28793	IGLV3-25	-2.74125	0.0414325	255631	COL24A1	1.90375	0.00285154
57609	DIP2B	2.02125	0.00706962	548596	CKMT1A	-2.88875	0.038689	7436	VLDLR	1.24625	0.00291319
10085	EDIL3	2.00875	0.00412651	28834	IGLC7	-2.99875	0.0378952	81533	ITFG1	2.28375	0.00292172
201283	AMZ2P1	2.00875	0.0103915	102465871	IGHG2	-3.09875	0.00938496	57763	ANKRA2	1.76625	0.00294269
11039	SMA4	1.9975	0.00984908	3514	IGKC	-4.67375	0.00605079	55830	GLT8D1	2.01625	0.002995
80318	GKAP1	1.995	0.0388732	4283	CXCL9	-5.28875	0.00583287	30008	EFEMP2	1.25375	0.00306248
5784	PTPN14	1.99375	0.0168251	3575	IL7R	-5.52625	0.0185462	55171	TBCCD1	2.3725	0.00308484
5607	MAP2K5	1.9925	0.00155186					255252	LRRC57	1.265	0.00309578
220594	USP32P2	1.99125	0.00427589					11078	TRIOBP	1.33125	0.00310674
3985	LIMK2	1.98125	0.00909078					57205	ATP10D	2.02875	0.00313607
374650	GOLGA6L5P	1.97875	0.00119597					3426	CFI	1.26125	0.00320635
1813	DRD2	1.97625	0.0250066					7058	THBS2	2.12125	0.00320646
7058	THBS2	1.975	0.00648246					7552	ZNF711	1.1775	0.00323929
6484	ST3GAL4	1.97125	0.00635133					25978	CHMP2B	2.4275	0.00324814
84898	PLXDC2	1.9625	0.0405989					728640	FAM133CP	3.50625	0.00330452
100653515	LOC100653515	1.9625	0.00972311					29116	MYLIP	1.075	0.00333364
341277	OVCH2	1.96	0.00031215					54662	TBC1D13	1.38875	0.00333623
4026	LPP	1.9575	0.00860584					56125	PCDHB11	2.8325	0.00339753
3609	ILF3	1.955	0.0107373					25904	CNOT10	1.0425	0.00350356
548644	POLR2J3	1.95	0.0269876					4237	MFAP2	2.74	0.0036414
5303	PIN4	1.94875	0.0057688					55212	BBS7	2.63125	0.00366818
84108	PCGF6	1.94375	0.0386771					51028	VPS36	1.74	0.0037054
23543	RBFOX2	1.94125	0.00275241					145407	C14orf37	1.335	0.00371782
10254	STAM2	1.9325	0.0242713					5987	TRIM27	1.98625	0.00384472
29994	BAZ2B	1.92625	0.00162209					85477	SCIN	1.22375	0.00391175
53938	PPIL3	1.9225	0.0337038					10013	HDAC6	1.17625	0.00396816
81550	TDRD3	1.9225	0.0321024					5286	PIK3C2A	1.785	0.00397261
54802	TRIT1	1.90375	0.00803143					5441	POLR2L	1.055	0.00410784
64778	FNDC3B	1.9	0.0122662					1117	CHI3L2	1.02875	0.00413338
800	CALD1	1.88875	0.0137912					51065	RPS27L	2.44125	0.00419395
53826	FXYD6	1.88875	0.0116699					6432	SRSF7	1.25125	0.00422754
55296	TBC1D19	1.88	0.0255869					138639	PTPDC1	1.075	0.00423723
60592	SCOC	1.88	0.00265142					4715	NDUFB9	1.145	0.00437067
91746	YTHDC1	1.87625	2.1e-05					22868	FASTKD2	1.57	0.00439211
9520	NPEPPS	1.87375	0.026302					2879	GPX4	1.185	0.00444183
10983	CCNI	1.86625	0.00591924					5274	SERPINI1	1.3425	0.00459557
861	RUNX1	1.8625	0.0343696					4493	MT1E	1.03	0.00464733
56994	CHPT1	1.85875	0.000256329					57703	CWC22	1.45125	0.00474477
5414	SEPTIN4	1.8575	0.0236146					51397	COMMD10	1.97125	0.0047909
22902	RUFY3	1.85625	3.91e-05					116828	N4BP2L2-IT2	1.8275	0.0048392
64901	RANBP17	1.8525	0.0249395					125919	ZNF543	2.33625	0.00495786
54800	KLHL24	1.85125	0.0348726					10254	STAM2	1.6025	0.00503537
54482	TRMT13	1.84875	0.0163501					8642	DCHS1	1.43625	0.00511159
26256	CABYR	1.84875	0.0235986					5308	PITX2	1.32125	0.0051135
80162	ATHL1	1.8425	3.24e-06					54497	HEATR5B	2.7125	0.00515699
54587	MXRA8	1.83875	0.0293164					55814	BDP1	1.6	0.00520236
150274	HSCB	1.8375	0.0348397					7059	THBS3	1.585	0.00524451
54453	RIN2	1.835	0.00197018					10171	RCL1	1.3125	0.00526223
5891	MOK	1.83125	0.0384953					10979	FERMT2	2.18375	0.00526794
11281	POU6F2	1.82875	0.0250052					55605	KIF21A	1.12	0.00534248
7049	TGFBR3	1.82625	0.0131003					55139	ANKZF1	1.6675	0.00534464
5786	PTPRA	1.81625	0.037945					54920	DUS2	1.14125	0.0053599
10052	GJC1	1.805	0.0108492					64236	PDLIM2	1.5275	0.0054427
387036	GUSBP2	1.8025	0.0193598					10196	PRMT3	1.0075	0.00545739
90799	CEP95	1.79625	0.00968613					5937	RBMS1	2.9725	0.0055109
8446	DUSP11	1.795	0.0181771					3790	KCNS3	1.345	0.0055638
26108	PYGO1	1.79125	0.00710193					80349	WDR61	1.88125	0.00556622
65125	WNK1	1.79	0.00110499					23380	SRGAP2	1.275	0.0055739
3643	INSR	1.79	0.00483274					4695	NDUFA2	1.7125	0.00564177
5922	RASA2	1.78875	0.0188795					5294	PIK3CG	1.7625	0.00565424
29994	BAZ2B	1.785	0.0463039					6484	ST3GAL4	1.95125	0.00566381
57584	ARHGAP21	1.785	0.017891					3646	EIF3E	1.83625	0.00569184
66008	TRAK2	1.78	0.0294244					83548	COG3	1.0675	0.00569239
84251	SGIP1	1.77875	0.0289836					10677	AVIL	1.2325	0.00581595
101927233	CTB-118N6.3	1.77875	0.0241797					5414	SEPTIN4	1.4675	0.00587362
100049076	GUSBP9	1.7675	0.0241622					84153	RNASEH2C	1.13125	0.00589591
1153	CIRBP	1.7675	0.0219112					23112	TNRC6B	1.41875	0.00602854
139886	SPIN4	1.76375	0.00334842					9400	RECQL5	1.0875	0.00604677
2074	ERCC6	1.76	0.0145821					64786	TBC1D15	2.9	0.00609437
4752	NEK3	1.7575	0.00234535					55245	UQCC1	1.28375	0.00617645
51256	TBC1D7	1.75375	0.00215797					9905	SGSM2	1.155	0.00618937
5297	PI4KA	1.75125	0.00117336					166655	TRIM60	1.08875	0.00632692
3595	IL12RB2	1.7475	0.00759231					257194	NEGR1	1.28375	0.00637143
9530	BAG4	1.74625	0.00890395					163486	DENND1B	3.3025	0.00641092
85301	COL27A1	1.74625	0.00499688					165324	UBXN2A	1.92125	0.00643821
158866	ZDHHC15	1.74	0.023917					57089	ENTPD7	2.7925	0.0064624
50863	NTM	1.73875	0.0312666					11010	GLIPR1	2.70375	0.00648653
440295	GOLGA6L9	1.7375	0.00276746					114793	FMNL2	1.6825	0.00653992
55082	ARGLU1	1.735	0.021081					175	AGA	1.1925	0.00658769
22941	SHANK2	1.73375	8.84e-05					390067	OR52H1	2.03125	0.00660238
153478	PLEKHG4B	1.73125	0.0148586					54808	DYM	2.795	0.00667998
5395	PMS2	1.72875	0.00535866					7846	TUBA1A	1.89875	0.00686153
56999	ADAMTS9	1.72625	0.0374853					137886	UBXN2B	3.89625	0.00691524
91860	CALML4	1.725	0.00915419					23598	PATZ1	3.95375	0.00698073
4803	NGF	1.72125	0.00570273					64421	DCLRE1C	1.00125	0.00702872
285671	RNF180	1.72	0.00162722					26022	TMEM98	2.48125	0.00704199
11039	SMA4	1.72	0.0212138					5093	PCBP1	1.20125	0.00730967
3655	ITGA6	1.715	0.000274195					26108	PYGO1	1.50875	0.00734009
7620	ZNF69	1.715	0.0112785					185	AGTR1	1.01125	0.0073436
9862	MED24	1.71375	0.0101381					26273	FBXO3	1.13875	0.00742455
1001	CDH3	1.7125	0.0188448					4440	MSI1	1.715	0.00748993
91369	ANKRD40	1.70875	0.0428431					649	BMP1	1.08125	0.00752797
4627	MYH9	1.70875	0.0202147					51148	CERCAM	1.9075	0.00755026
6619	SNAPC3	1.7075	0.0306516					2191	FAP	4.95875	0.00756749
118491	TTC18	1.7075	0.0292124					10724	MGEA5	1.00875	0.0076944
652276	LOC652276	1.70625	9.54e-05					27340	UTP20	1.1325	0.00769523
84859	LRCH3	1.7025	0.0454921					2195	FAT1	3.19	0.00771556
7166	TPH1	1.70125	0.000512014					151056	PLB1	1.31625	0.00784625
57335	ZNF286A	1.6975	0.0262836					7341	SUMO1	2.17125	0.00786415
132949	AASDH	1.69625	0.0024668					1378	CR1	1.43625	0.0078846
2145	EZH1	1.69625	0.0109801					131578	LRRC15	1.695	0.00792595
1303	COL12A1	1.69375	0.0471745					51135	IRAK4	1.57625	0.00794516
90576	ZNF799	1.69125	0.00104207					1024	CDK8	3.5575	0.00802131
64759	TNS3	1.69	0.0412996					4218	RAB8A	1.565	0.00807038
55769	ZNF83	1.68625	0.00414424					26528	DAZAP1	1.08125	0.00822555
11328	FKBP9	1.68375	9.64e-05					414189	AGAP6	2.03875	0.00826488
23650	TRIM29	1.68375	0.00601506					26137	ZBTB20	3.0225	0.00856324
146198	ZFP90	1.68375	0.000565946					23268	DNMBP	1.0525	0.00862091
7693	ZNF134	1.6825	0.00245583					51276	ZNF571	1.2675	0.00862132
1781	DYNC1I2	1.67875	0.00512463					11060	WWP2	1.43875	0.0086598
10043	TOM1	1.67875	0.0494092					10404	CPQ	2.42	0.00868941
256471	MFSD8	1.67625	0.00116031					101060578	LOC101060578	1.71375	0.00879559
401375	GTF2IRD2P1	1.67375	0.0256135					654254	ZNF732	1.185	0.00882053
55102	ATG2B	1.67375	0.00139013					51647	FAM96B	1.23875	0.00894844
57412	AS3MT	1.6725	0.000327595					302	ANXA2	1.205	0.00896882
154810	AMOTL1	1.6675	0.0131371					4323	MMP14	2.12125	0.0089871
54768	HYDIN	1.665	0.00100076					83473	KATNAL2	1.17625	0.00899554
9902	MRC2	1.6625	0.005988					5250	SLC25A3	1.145	0.00900048
51320	MEX3C	1.6625	0.00240572					2335	FN1	2.6475	0.00901792
54876	DCAF16	1.66	0.0477345					8228	PNPLA4	1.51	0.00903541
1416	CRYBB2P1	1.65875	0.00223625					1432	MAPK14	1.56625	0.00913141
653188	GUSBP3	1.64625	0.0374897					4175	MCM6	1.3375	0.00919977
53944	CSNK1G1	1.64	0.00161411					151230	KLHL23	1.14	0.0092726
79840	NHEJ1	1.63875	0.0225035					5935	RBM3	2.455	0.00934341
51148	CERCAM	1.6375	0.0389664					55074	OXR1	1.2025	0.00935973
4763	NF1	1.63	0.0316814					8100	IFT88	1.52375	0.00952551
11320	MGAT4A	1.62875	0.0249977					4363	ABCC1	1.12875	0.00953084
23209	MLC1	1.62	0.014906					7385	UQCRC2	2.365	0.00969674
84669	USP32	1.61625	0.002213					826	CAPNS1	1.56625	0.0096985
23259	DDHD2	1.6125	0.018097					7738	ZNF184	1.7075	0.00972066
57224	NHSL1	1.61	0.00885543					133022	TRAM1L1	1.16625	0.00972159
441502	RPS26P11	1.61	0.00340248					135295	SRSF12	1.82125	0.00990969
7552	ZNF711	1.6075	0.00240781					440021	KRTAP5-2	1.03875	0.00998986
7168	TPM1	1.605	0.00429195					25797	QPCT	1.04875	0.0100692
10725	NFAT5	1.605	0.00352012					26959	HBP1	1.28375	0.0100987
399979	SNX19	1.6025	0.0433791					442578	STAG3L3	2.19875	0.0101733
100381270	ZBED6	1.6	0.0269075					104	ADARB1	1.0025	0.0103236
55153	SDAD1	1.59875	0.0394175					25878	MXRA5	2.4725	0.0103939
50618	ITSN2	1.5975	0.047714					387	RHOA	1.14875	0.0106544
140890	SREK1	1.59375	0.0123244					5048	PAFAH1B1	1.25875	0.0106825
9943	OXSR1	1.58875	0.000580405					4671	NAIP	1.505	0.0106864
7372	UMPS	1.5875	0.000513867					5479	PPIB	1.57125	0.0107702
284385	C19orf82	1.58625	0.000164774					257218	SHPRH	1.49	0.0108336
80336	PABPC1L	1.58375	0.0211072					22925	PLA2R1	1.03	0.0108352
10283	CWC27	1.58	0.0338192					80162	ATHL1	1.215	0.0109064
10207	INADL	1.5775	0.0300157					100131998	RRN3P3	1.61625	0.0110867
5549	PRELP	1.57625	0.00239596					5636	PRPSAP2	2.77875	0.0110988
79729	SH3D21	1.57375	0.00137466					957	ENTPD5	1.22125	0.0111086
390980	ZNF805	1.57	0.0203868					2132	EXT2	2.335	0.0111253
100507607	NPIPB9	1.5675	0.0107463					10920	COPS8	1.16375	0.0113138
8481	OFD1	1.5625	0.00423399					80215	RUNX1-IT1	2.42375	0.0113402
114659	LRRC37B	1.55625	0.011475					26224	FBXL3	1.6625	0.0113791
4281	MID1	1.555	0.012901					56965	PARP6	1.56625	0.0114012
11011	TLK2	1.55125	0.00150853					56928	SPPL2B	1.35625	0.0114324
9984	THOC1	1.55125	0.0301308					9455	HOMER2	1.0975	0.011509
3033	HADH	1.55	0.0168831					4733	DRG1	3.73625	0.0115605
29957	SLC25A24	1.5475	0.0101215					56911	MAP3K7CL	1.175	0.0116574
642517	AGAP9	1.54625	0.0421007					90441	ZNF622	1.03875	0.0116996
55599	RNPC3	1.545	0.0188104					6286	S100P	1.925	0.011732
8828	NRP2	1.545	0.0212806					26578	OSTF1	1.675	0.0117432
84303	CHCHD6	1.54125	0.0351217					2969	GTF2I	2.0125	0.0118974
1730	DIAPH2	1.54125	0.00884391					10094	ARPC3	1.6925	0.0119666
7716	VEZF1	1.54125	0.0132654					112849	L3HYPDH	1.605	0.0119829
59084	ENPP5	1.54	0.00560685					163081	ZNF567	1.3675	0.0122012
221264	AK9	1.5375	0.0142135					170690	ADAMTS16	2.70375	0.0122513
84189	SLITRK6	1.5375	0.0023036					4086	SMAD1	1.52125	0.0123861
6608	SMO	1.53625	0.00148965					8460	TPST1	1.08375	0.0124722
89944	GLB1L2	1.5325	0.0357198					56975	FAM20C	1.08875	0.0125197
4089	SMAD4	1.5325	0.000142682					347168	OR1J1	1.27375	0.0125531
51233	DRICH1	1.52625	7.02e-05					339883	C3orf35	1.82375	0.0125604
92270	ATP6AP1L	1.525	0.000659392					26260	FBXO25	4.37	0.0125849
6908	TBP	1.525	0.01812					4784	NFIX	2.17375	0.0125995
56158	TEX12	1.5225	0.0251835					56477	CCL28	1.51125	0.0126331
80155	NAA15	1.5175	0.0444968					79982	DNAJB14	2.49375	0.0126751
4194	MDM4	1.51625	0.0488951					1730	DIAPH2	1.455	0.0128768
64091	POPDC2	1.51625	0.0128782					79656	BEND5	3.575	0.0129637
57223	SMEK2	1.515	0.0463902					1293	COL6A3	1.4	0.0129901
7741	ZSCAN26	1.51375	0.00122327					28985	MCTS1	1.72875	0.0130008
613210	DEFB136	1.51375	0.0395074					441502	RPS26P11	1.4475	0.0130528
400818	NBPF9	1.51125	0.0310958					1500	CTNND1	1.15625	0.0132916
51754	TMEM8B	1.51	0.00260524					892	CCNC	1.87875	0.0133194
5382	PMS2P4	1.50375	0.0473168					55789	DEPDC1B	1.26125	0.0133686
284098	PIGW	1.50375	0.0404304					54014	BRWD1	1.56	0.0133758
56242	ZNF253	1.50375	0.00330719					80003	PCNXL2	2.52375	0.0134238
113146	AHNAK2	1.5025	0.0108642					2796	GNRH1	1.84125	0.0134332
148641	SLC35F3	1.5	0.00255033					5547	PRCP	1.56875	0.013456
51028	VPS36	1.5	0.0378825					126375	ZNF792	1.06875	0.013507
84902	CEP89	1.5	0.0205383					5157	PDGFRL	2.295	0.0135436
7003	TEAD1	1.49625	0.0431491					1303	COL12A1	2.4375	0.0135884
29068	ZBTB44	1.495	0.0458482					9960	USP3	1.4575	0.0136173
4750	NEK1	1.4925	0.0468012					79674	VEPH1	2.66375	0.0138093
1488	CTBP2	1.4925	0.000384448					4697	NDUFA4	3.2025	0.0138213
84874	ZNF514	1.49	0.00985099					50831	TAS2R3	1.965	0.0138608
5087	PBX1	1.48875	0.0184757					285761	DCBLD1	1.225	0.0138904
375260	WASH2P	1.48875	0.0237146					55096	EBLN2	1.7225	0.0139744
54891	INO80D	1.48875	0.0491166					51439	FAM8A1	1.56875	0.0143121
10493	VAT1	1.48625	0.00254934					79741	CCDC7	1.82125	0.0143436
22826	DNAJC8	1.485	0.00577084					256227	STEAP1B	1.3175	0.0143486
139596	UPRT	1.485	0.00764228					145853	C15orf61	2.21375	0.0143502
9517	SPTLC2	1.485	0.0458462					25875	LETMD1	1.535	0.0145498
55558	PLXNA3	1.4825	0.00169648					7251	TSG101	1.72125	0.0147515
8642	DCHS1	1.48	0.00638136					90141	EFCAB11	1.44375	0.0148069
138639	PTPDC1	1.47875	0.00494665					55250	ELP2	1.0725	0.0149187
5927	KDM5A	1.4775	0.00554247					11015	KDELR3	1.6125	0.0151378
84450	ZNF512	1.47625	0.00991534					23398	PPWD1	1.8025	0.0153063
116966	WDR17	1.47625	0.00374798					116984	ARAP2	1.34875	0.0154514
4642	MYO1D	1.475	0.00284555					3984	LIMK1	1.73625	0.015453
81669	CCNL2	1.47375	0.00352181					140881	DEFB129	1.3175	0.0155266
51647	FAM96B	1.4725	0.000600451					10015	PDCD6IP	1.53125	0.0155721
9969	MED13	1.4675	0.0410292					153222	CREBRF	1.305	0.0156167
7109	TRAPPC10	1.4675	0.0363686					5358	PLS3	1.48875	0.0156928
23112	TNRC6B	1.46625	0.0270047					3312	HSPA8	2.725	0.0157054
329	BIRC2	1.46375	0.00972441					10043	TOM1	1.6975	0.0157594
26054	SENP6	1.46125	0.0373805					323	APBB2	2.15	0.0158008
202333	CMYA5	1.45625	0.00488748					10577	NPC2	2.88125	0.0158637
9487	PIGL	1.455	0.0127855					6209	RPS15	1.92625	0.0159034
7594	ZNF43	1.455	0.0107725					3842	TNPO1	2.3575	0.0159723
5152	PDE9A	1.455	0.00316239					79602	ADIPOR2	2.36125	0.0159876
30837	SOCS7	1.45125	0.00955006					159090	FAM122B	1.54125	0.0161181
440498	HSBP1L1	1.4475	0.0270056					26118	WSB1	2.25625	0.0161604
1022	CDK7	1.4425	0.045326					27166	PRELID1	1.88625	0.0161962
7289	TULP3	1.4425	0.0135876					8732	RNGTT	1.01125	0.0162268
10781	ZNF266	1.44125	2.24e-05					79098	C1orf116	1.11125	0.0163236
55582	KIF27	1.43875	0.0214196					79868	ALG13	2.70625	0.0163494
9284	NPIPA1	1.4375	0.0308663					10499	NCOA2	1.6825	0.0165087
2886	GRB7	1.435	0.0445592					9179	AP4M1	1.3025	0.0165206
25943	C20orf194	1.435	0.0188678					6591	SNAI2	1.76375	0.0166815
25941	TPGS2	1.43125	0.0278671					9884	LRRC37A	1.8075	0.016703
57504	MTA3	1.43	0.0459638					165530	CLEC4F	1.61	0.016799
130502	TTC32	1.43	0.0410751					55790	CSGALNACT1	2.54125	0.0168199
80114	BICC1	1.42625	0.0372612					51175	TUBE1	1.11625	0.0169056
9849	ZNF518A	1.4225	0.0286997					9265	CYTH3	2.99625	0.0169841
8612	PPAP2C	1.42	0.0399815					2241	FER	2.73875	0.0170726
6251	RSU1	1.41875	2.33e-05					148523	CIART	1.19625	0.0171164
79781	IQCA1	1.41625	0.00757865					57523	NYNRIN	1.005	0.0171666
115024	NT5C3B	1.415	0.0174486					84189	SLITRK6	1.53875	0.017221
22995	CEP152	1.41375	0.0200309					84068	SLC10A7	1.62375	0.0172887
9728	SECISBP2L	1.41375	0.0025829					2260	FGFR1	2.90625	0.0172934
7562	ZNF708	1.4125	0.00401549					56126	PCDHB10	1.135	0.0172947
89838	ULK4P1	1.41125	0.0392552					10656	KHDRBS3	2.35875	0.0173315
25878	MXRA5	1.40875	0.0429504					25903	OLFML2B	2.3225	0.0173637
10014	HDAC5	1.40625	0.00266994					1477	CSTF1	1.235	0.0175369
341208	HEPHL1	1.405	0.00157995					126295	ZNF57	1.66625	0.0175437
284058	KANSL1	1.40375	0.000791266					5108	PCM1	1.52375	0.0176263
166378	SPATA5	1.4	0.000569289					84188	FAR1	1.86625	0.0177298
26059	ERC2	1.39625	0.000334764					100129543	ZNF730	1.11	0.0180167
10079	ATP9A	1.39625	0.000123969					55819	RNF130	1.7675	0.0180942
25809	TTLL1	1.39625	0.00347869					81618	ITM2C	3.1125	0.0181306
4162	MCAM	1.3925	0.0095918					85465	EPT1	1.6975	0.0182986
57722	IGDCC4	1.3925	0.00523031					726	CAPN5	1.0525	0.018314
64834	ELOVL1	1.39	0.0349296					118432	RPL29P2	1.2425	0.018323
23530	NNT	1.39	0.00996785					950	SCARB2	1.62	0.0183243
51308	REEP2	1.39	0.00136472					1994	ELAVL1	1.3275	0.0184294
10464	PIBF1	1.39	0.0395712					79258	MMEL1	1.01875	0.018454
79885	HDAC11	1.38875	0.00402554					57211	GPR126	2.85	0.0187562
6714	SRC	1.3875	0.00237648					6259	RYK	2.285	0.018873
642517	AGAP9	1.3825	0.0418539					81846	SBF2	1.035	0.0190502
55604	LRRC16A	1.37875	0.0405284					5693	PSMB5	1.5525	0.0191154
3675	ITGA3	1.3775	0.000498757					171019	ADAMTS19	1.29625	0.0191443
55034	MOCOS	1.375	0.013058					6388	SDF2	1.18	0.0192871
59352	LGR6	1.37375	0.0117235					55591	VEZT	1.59875	0.0193328
8559	PRPF18	1.3725	0.0383212					23043	TNIK	2.48	0.0193925
401251	SAPCD1	1.37125	0.0486675					728643	HNRNPA1P33	1.67625	0.0193952
7013	TERF1	1.37125	0.032666					253512	SLC25A30	1.54	0.019419
165055	CCDC138	1.36875	0.0187041					54780	NSMCE4A	2.375	0.0194339
114823	LENG8	1.36875	0.0254899					51752	ERAP1	1.5925	0.0194609
81576	CCDC130	1.3675	0.00352855					10630	PDPN	1.4875	0.0194813
54665	RSBN1	1.36625	0.00425166					152015	ROPN1B	1.61	0.0194837
55100	WDR70	1.36625	0.00977893					139324	HDX	2.08125	0.0195565
57035	RSRP1	1.36375	0.00198199					9181	ARHGEF2	1.59	0.0197263
23394	ADNP	1.36375	0.0165083					8612	PPAP2C	1.62875	0.0198955
6774	STAT3	1.3625	0.0395401					63901	FAM111A	1.5625	0.020017
10111	RAD50	1.36125	0.0348661					7707	ZNF148	2.575	0.0200501
10156	RASA4	1.36125	0.00378082					440515	ZNF506	1.0175	0.0202869
6642	SNX1	1.36125	0.00619615					84319	CMSS1	1.3	0.0204775
192670	AGO4	1.36	0.0365005					9847	C2CD5	1.5525	0.0206161
1355	COX15	1.36	0.0481938					1436	CSF1R	1.425	0.0206439
54883	CWC25	1.36	0.00128132					55500	ETNK1	1.035	0.0207087
4237	MFAP2	1.3575	0.0424015					23339	VPS39	1.5025	0.0207441
1388	ATF6B	1.3575	0.0154881					54441	STAG3L1	4.0975	0.020784
9108	MTMR7	1.3575	0.0024281					23236	PLCB1	1.82125	0.0208982
79877	DCAKD	1.3575	0.00184342					9061	PAPSS1	1.06	0.0209099
255403	ZNF718	1.355	0.00321109					4240	MFGE8	2.80125	0.0210765
222584	FAM83B	1.3525	0.000380328					23107	MRPS27	2.015	0.0211306
151230	KLHL23	1.35	0.0181421					23557	SNAPIN	1.23875	0.0212444
1998	ELF2	1.34875	0.00436727					80205	CHD9	2.97125	0.0212605
79780	CCDC82	1.34875	0.0174356					54872	PIGG	2.515	0.0213121
252983	STXBP4	1.34875	0.0161497					317662	FAM149B1	1.215	0.021329
151525	WDSUB1	1.345	0.0160718					80303	EFHD1	1.01	0.0213942
6738	TROVE2	1.34375	0.0333355					57182	ANKRD50	1.26875	0.0214507
8645	KCNK5	1.34375	0.020633					7620	ZNF69	1.595	0.0214947
10398	MYL9	1.34375	0.0258678					538	ATP7A	1.73125	0.0215275
64236	PDLIM2	1.34125	0.0212706					165	AEBP1	1.0675	0.0218805
1995	ELAVL3	1.34	2.26e-06					134266	GRPEL2	1.32875	0.0218964
221656	KDM1B	1.3375	2.11e-05					360132	FKBP9P1	1.2675	0.0219937
23635	SSBP2	1.33625	0.0121587					1486	CTBS	1.18875	0.0220653
8242	KDM5C	1.33625	0.021376					27429	HTRA2	1.04	0.022472
1387	CREBBP	1.33625	0.021566					57103	C12orf5	1.30375	0.0226084
9527	GOSR1	1.33625	0.0170503					6207	RPS13	1.42625	0.0227709
79159	NOL12	1.33625	0.00114674					286410	ATP11C	1.00375	0.0228286
22906	TRAK1	1.335	0.0116548					7046	TGFBR1	1.72	0.0229227
200734	SPRED2	1.33375	0.0454938					57228	SMAGP	1.03625	0.0229244
23353	SUN1	1.33375	0.0185429					89797	NAV2	1.83	0.0229292
119587	CPXM2	1.33125	0.0109702					28976	ACAD9	1.50125	0.0230331
27077	B9D1	1.325	0.0119311					118491	TTC18	2.225	0.023168
54874	FNBP1L	1.32375	0.00308964					23635	SSBP2	1.5425	0.0231804
79595	SAP130	1.32375	4.97e-06					80298	MTERF2	1.07875	0.0233894
55788	LMBRD1	1.32375	0.00974976					2631	GBAS	1.23625	0.0234925
7158	TP53BP1	1.32	0.0225996					4889	NPY5R	1.5375	0.0236671
79856	SNX22	1.31875	0.000570162					7057	THBS1	1.75	0.0237321
84804	MFSD9	1.31625	0.0240761					55365	TMEM176A	2.11125	0.0238542
9289	GPR56	1.31375	0.0186536					4809	NHP2L1	2.36875	0.0238826
5921	RASA1	1.31	0.033864					25996	REXO2	3.52625	0.0239341
10946	SF3A3	1.30875	0.000214116					6655	SOS2	1.82625	0.0241612
57337	SENP7	1.30625	0.0151863					8560	DEGS1	2.26125	0.0243587
51020	HDDC2	1.305	0.0454031					11119	BTN3A1	1.00375	0.0243767
85301	COL27A1	1.305	0.0274247					2706	GJB2	1.10375	0.0243926
55802	DCP1A	1.30375	0.00567076					1387	CREBBP	1.1225	0.0243929
414	ARSD	1.29875	0.000523691					5067	CNTN3	1.4825	0.0244053
7337	UBE3A	1.29875	0.00186547					1725	DHPS	1.105	0.0244617
9124	PDLIM1	1.2975	0.00733587					28974	C19orf53	1.1075	0.0244916
8722	CTSF	1.29625	0.00297037					7918	GPANK1	1.90625	0.0244936
116828	N4BP2L2-IT2	1.29625	0.0303784					56256	SERTAD4	2.02	0.0245231
83935	TMEM133	1.295	0.000461657					5654	HTRA1	1.93875	0.024525
10936	GPR75	1.29375	0.0414384					23035	PHLPP2	1.23625	0.0246383
64794	DDX31	1.29375	0.0195837					390980	ZNF805	1.2	0.0247003
22909	FAN1	1.29375	0.000563526					51661	FKBP7	4.57875	0.0248273
25827	FBXL2	1.2925	0.0442054					25983	NGDN	1.38875	0.0248984
55205	ZNF532	1.2925	0.00517038					26512	INTS6	1.09125	0.0249151
84240	ZCCHC9	1.29	0.00309066					2595	GANC	1.2175	0.0249156
100287171	WASH1	1.28875	0.0231585					5156	PDGFRA	3.15625	0.0250767
375248	ANKRD36	1.2875	0.00103708					10085	EDIL3	1.34375	0.0252282
401207	C5orf63	1.28625	0.00395977					6289	SAA2	1.1275	0.0253327
88455	ANKRD13A	1.28625	0.0426287					79648	MCPH1	1.31625	0.0253366
56965	PARP6	1.285	0.0324169					9358	ITGBL1	2.02	0.0253585
647024	C6orf132	1.28375	0.0395494					2630	GBAP1	1.345	0.0254203
90678	LRSAM1	1.28375	0.0180274					440585	FAM183A	1.38375	0.0254927
25875	LETMD1	1.2825	0.0369337					112	ADCY6	3.38875	0.0255273
5311	PKD2	1.28125	0.00396195					728963	RPS15AP10	1.07125	0.0255496
79948	LPPR3	1.28125	0.000980778					25843	MOB4	1.12875	0.0255506
9617	MTRF1	1.28	0.0115222					55860	ACTR10	1.51375	0.0255598
5327	PLAT	1.27875	0.00374667					2037	EPB41L2	2.67	0.0255639
9282	MED14	1.27875	0.0206551					55754	TMEM30A	1.68125	0.0257025
10605	PAIP1	1.2775	0.0438216					83607	AMMECR1L	1.0925	0.0257328
84529	C15orf41	1.2775	0.00041338					55540	IL17RB	1.61625	0.0257807
85465	EPT1	1.275	0.000751484					80167	C4orf29	1.66	0.0258603
150962	PUS10	1.275	0.00981705					10184	LHFPL2	1.29875	0.0258971
11174	ADAMTS6	1.275	0.0453822					57658	CALCOCO1	1.90375	0.0259756
221443	OARD1	1.275	0.0325802					23522	KAT6B	1.09	0.0259849
9063	PIAS2	1.27375	0.0444676					2049	EPHB3	1.44	0.026251
8577	TMEFF1	1.27125	0.00094595					79191	IRX3	1.10375	0.0263856
80349	WDR61	1.27125	0.0429717					2019	EN1	1.625	0.0264429
23410	SIRT3	1.26875	0.000396207					6132	RPL8	1.97375	0.02651
26284	ERAL1	1.26875	0.0296427					2857	GPR34	2.155	0.0266113
56650	CLDND1	1.2675	0.0259309					2970	GTF2IP1	1.20625	0.0266438
255967	PAN3	1.265	0.018341					5436	POLR2G	1.52125	0.0267309
51663	ZFR	1.26375	0.035131					169200	TMEM64	2.15875	0.0267898
11160	ERLIN2	1.26375	0.00761089					2263	FGFR2	2.8625	0.0268545
153770	PLAC8L1	1.2625	0.0103794					3671	ISLR	1.695	0.0269387
1893	ECM1	1.25875	0.0459444					834	CASP1	2.5475	0.0269729
1912	PHC2	1.255	0.00278727					23429	RYBP	1.30375	0.0271046
7220	TRPC1	1.25375	0.00124428					29978	UBQLN2	1.61625	0.0271212
1832	DSP	1.25	0.0168736					653268	AGAP7P	1.68625	0.0271713
51496	CTDSPL2	1.24875	0.00409034					57224	NHSL1	1.15875	0.0272805
57551	TAOK1	1.24875	0.00287895					688	KLF5	2.3125	0.027309
200030	NBPF11	1.2475	0.0401122					942	CD86	1.595	0.0273099
5137	PDE1C	1.245	0.017126					2799	GNS	1.5875	0.0273538
6792	CDKL5	1.245	0.0183134					131965	METTL6	2.14	0.0274473
80204	FBXO11	1.2425	0.00677297					388558	ZNF808	1.7075	0.0276122
11193	WBP4	1.24125	0.0350415					4886	NPY1R	3.3025	0.0277981
64708	COPS7B	1.23875	0.016947					51747	LUC7L3	2.85875	0.0278111
54822	TRPM7	1.23875	0.0290476					27152	INTU	1.02125	0.0279199
84441	MAML2	1.23625	0.0019502					4040	LRP6	1.22875	0.0281866
90589	ZNF625	1.23625	0.00767904					6203	RPS9	1.93375	0.0284484
641977	SEPT7P2	1.23375	0.0329862					139886	SPIN4	1.58625	0.0286407
28976	ACAD9	1.2325	0.0025956					64778	FNDC3B	4.08625	0.0286503
5991	RFX3	1.2325	0.0317578					5137	PDE1C	1.4125	0.0287495
26127	FGFR1OP2	1.2325	0.0118065					871	SERPINH1	1.15375	0.0288454
5439	POLR2J	1.23	0.022719					8618	CADPS	1.07	0.0289093
8533	COPS3	1.23	0.0345285					5859	QARS	2.28875	0.0289501
53346	TM6SF1	1.2275	0.0049538					22872	SEC31A	2.50625	0.029204
9611	NCOR1	1.2275	0.0275566					9943	OXSR1	1.73125	0.0293734
9349	RPL23	1.2275	0.0240781					51091	SEPSECS	1.23875	0.0294789
441250	TYW1B	1.22625	0.0108977					170506	DHX36	1.78875	0.0295258
27342	RABGEF1	1.22625	0.000549438					79048	SECISBP2	2.82375	0.029562
55617	TASP1	1.22625	0.00328639					9902	MRC2	1.915	0.0296373
2132	EXT2	1.225	0.0122495					23248	RPRD2	1.89875	0.029678
9931	HELZ	1.225	0.00139014					26985	AP3M1	1.53125	0.0299069
11329	STK38	1.22375	0.0305672					22803	XRN2	1.18	0.0301067
55209	SETD5	1.2225	0.0100416					90102	PHLDB2	1.3775	0.0301501
55291	PPP6R3	1.22125	0.0107186					382	ARF6	1.31	0.0305095
6659	SOX4	1.22	0.00795162					10971	YWHAQ	1.2475	0.0306823
10848	PPP1R13L	1.21875	0.0197932					7014	TERF2	1.455	0.0307528
26767	RNU105B	1.21875	0.00984503					4060	LUM	3.10125	0.0310733
5928	RBBP4	1.21625	0.0138009					9419	CRIPT	2.75625	0.0311756
80005	DOCK5	1.215	0.0400747					10631	POSTN	2.70625	0.0312576
163	AP2B1	1.215	0.0277253					51642	MRPL48	1.7	0.0313668
3607	FOXK2	1.215	0.0316924					84874	ZNF514	1.73625	0.0313818
79703	C11orf80	1.2125	0.00213021					54757	FAM20A	1.09125	0.0314607
6443	SGCB	1.21	0.0205052					154664	ABCA13	1.03625	0.0314649
8500	PPFIA1	1.21	0.041254					84251	SGIP1	1.62875	0.0315644
11278	KLF12	1.21	0.0150245					378	ARF4	1.21	0.031799
83752	LONP2	1.20875	0.0340583					25963	TMEM87A	1.57625	0.0318623
2686	GGT7	1.2075	0.00011025					6619	SNAPC3	2.06625	0.032603
11321	GPN1	1.20625	0.0296547					11281	POU6F2	1.08	0.0328848
65979	PHACTR4	1.20375	0.00548721					54838	WBP1L	2.60375	0.033112
653739	LOC653739	1.20375	0.0259647					83892	KCTD10	1.09625	0.0333779
23476	BRD4	1.20375	0.0130766					64175	LEPRE1	1.31125	0.0333858
85004	RERG	1.2025	0.00533033					645142	PPIAL4D	1.43875	0.0335896
79746	ECHDC3	1.20125	0.0326436					10903	MTMR11	1.62125	0.0338014
79871	RPAP2	1.2	0.00881682					51347	TAOK3	2.18375	0.0339506
23384	SPECC1L	1.19875	0.00655236					6160	RPL31	1.69875	0.0339784
56132	PCDHB3	1.1975	0.00458109					123228	SENP8	1.565	0.0339968
157680	VPS13B	1.1925	0.0361381					57711	ZNF529	2.4675	0.0342022
326343	MT1DP	1.19125	0.0141889					3364	HUS1	2.06375	0.0342086
51057	WDPCP	1.18875	0.00277175					122553	TRAPPC6B	1.1975	0.0342939
92154	MTSS1L	1.18875	0.00580318					51111	SUV420H1	2.54	0.0343207
6760	SS18	1.18875	0.0096888					8514	KCNAB2	1.04125	0.034452
27252	KLHL20	1.1875	0.0134256					51300	TIMMDC1	1.18125	0.0344618
525	ATP6V1B1	1.18625	0.0165579					84545	MRPL43	1.625	0.0344835
54497	HEATR5B	1.18625	0.0448633					10137	RBM12	1.95375	0.0345622
56985	ADPRM	1.185	0.0171759					54587	MXRA8	1.84875	0.03468
5383	PMS2P5	1.18375	0.00140004					3998	LMAN1	1.66125	0.0347338
729759	OR4F29	1.1825	0.00879702					23261	CAMTA1	2.96625	0.0347547
645784	ANKRD36BP2	1.1825	0.00041374					151188	ARL6IP6	1.05625	0.0348237
29798	C2orf27A	1.18125	0.0070346					4498	MT1JP	1.095	0.03485
56123	PCDHB13	1.18125	0.0424134					25824	PRDX5	1.855	0.0348817
145407	C14orf37	1.18125	0.00581113					55132	LARP1B	1.11375	0.0349236
23326	USP22	1.18	0.0095102					51575	ESF1	2.615	0.0349912
57182	ANKRD50	1.17875	0.0178299					196051	PPAPDC1A	1.38375	0.035064
4091	SMAD6	1.17375	0.000565223					51115	RMDN1	4.07875	0.0351278
349075	ZNF713	1.1725	0.0468888					9481	SLC25A27	2.33875	0.0356287
63035	BCORL1	1.1675	0.0373506					85440	DOCK7	1.4275	0.0356378
9406	ZRANB2	1.16625	0.00792438					8673	VAMP8	1.14625	0.0356473
1196	CLK2	1.16625	0.0186157					23644	EDC4	1.03375	0.0357466
388165	UBE2Q2P1	1.165	0.0287709					7965	AIMP2	1.11	0.0359481
284371	ZNF841	1.165	0.022892					26095	PTPN20B	1.165	0.0361214
7072	TIA1	1.16375	0.00408323					65084	TMEM135	1.4175	0.0362274
79684	MSANTD2	1.16375	0.00131976					29798	C2orf27A	1.52	0.0362375
10903	MTMR11	1.16	0.0347031					1009	CDH11	1.7675	0.0364813
27241	BBS9	1.16	0.00241043					158866	ZDHHC15	1.81125	0.036505
123228	SENP8	1.1575	0.0127915					754	PTTG1IP	1.195	0.0365063
6597	SMARCA4	1.1575	0.00685523					79158	GNPTAB	1.54625	0.0365108
5627	PROS1	1.1525	0.00360867					56099	PCDHGB7	1.11125	0.0365213
64400	AKTIP	1.1525	0.0186689					221322	TBC1D32	1.57	0.0365599
9180	OSMR	1.15125	0.0102081					65250	C5orf42	3.0525	0.0366991
261726	TIPRL	1.15	0.00311031					8382	NME5	1.79125	0.036715
56895	AGPAT4	1.15	0.000814509					10725	NFAT5	1.26375	0.0367344
11223	MST1L	1.14875	0.000829196					11103	KRR1	1.32625	0.0367354
51406	NOL7	1.14875	0.0463693					8869	ST3GAL5	2.08	0.036855
50831	TAS2R3	1.14875	0.0227532					653129	PTPN20A	1.0625	0.0368614
9748	SLK	1.14875	0.0118033					162655	ZNF519	1.71375	0.036959
27152	INTU	1.14375	0.0497691					5382	PMS2P4	1.12875	0.0369647
162239	ZFP1	1.14125	0.000851436					1000	CDH2	1.13875	0.0370265
9853	RUSC2	1.14	0.0213011					81688	C6orf62	1.605	0.0371763
8777	MPDZ	1.14	0.00187007					4637	MYL6	2.42	0.0372565
653720	GOLGA8M	1.14	0.00193478					776	CACNA1D	3.1325	0.0373683
10124	ARL4A	1.13875	0.0498556					166614	DCLK2	3.70375	0.0375135
11122	PTPRT	1.1375	0.00634335					55167	MSL2	3.10375	0.037658
1942	EFNA1	1.13625	0.00366143					2173	FABP7	2.635	0.0377677
390858	OACYLP	1.13625	0.00700289					5495	PPM1B	1.25125	0.0377706
55687	TRMU	1.13625	0.02906					55285	RBM41	1.185	0.0379618
100287171	WASH1	1.135	0.0470639					54977	SLC25A38	1.42625	0.0383567
89890	KBTBD6	1.1325	0.00324426					727	C5	1.29875	0.0384056
4318	MMP9	1.13125	0.00165736					283537	SLC46A3	1.00375	0.0384655
5534	PPP3R1	1.12875	0.00186586					84914	ZNF587	1.26125	0.038493
137994	LETM2	1.12875	0.0218622					442582	STAG3L2	1.385	0.0390858
440295	GOLGA6L9	1.12875	0.00107509					9697	TRAM2	1.145	0.0390862
283848	CES4A	1.1275	0.000616298					6421	SFPQ	2.805	0.0393755
93627	TBCK	1.12625	0.0308698					25809	TTLL1	1.13	0.0395944
100507424	LOC100507424	1.12625	0.0217002					1351	COX8A	1.07	0.0396252
57560	IFT80	1.125	0.0420158					10427	SEC24B	1.26625	0.0396619
285148	IAH1	1.12375	0.0481455					11174	ADAMTS6	1.35375	0.0397411
51626	DYNC2LI1	1.12375	0.0160663					5919	RARRES2	1.45125	0.0398435
8603	FAM193A	1.12375	0.0295059					25764	HYPK	1.78375	0.0399358
3709	ITPR2	1.12375	0.010752					11274	USP18	1.095	0.0400657
11016	ATF7	1.1225	0.0280494					10207	INADL	1.43375	0.040199
6605	SMARCE1	1.12125	0.0177755					1946	EFNA5	1.28125	0.0402119
24149	ZNF318	1.12	0.0426084					8411	EEA1	1.27625	0.0403217
441308	OR4F21	1.12	0.0146662					2014	EMP3	1.59375	0.040532
54948	MRPL16	1.11625	0.00836012					11329	STK38	1.505	0.0405738
54987	C1orf123	1.11375	0.0252526					22828	SCAF8	1.305	0.0407175
3490	IGFBP7	1.1125	0.017773					8826	IQGAP1	1.22125	0.0407797
7917	BAG6	1.1125	0.0117492					201283	AMZ2P1	1.285	0.0408513
54516	MTRF1L	1.11	0.0118036					23650	TRIM29	1.44875	0.0409386
6497	SKI	1.1075	0.0290126					1615	DARS	2.93	0.0409508
401577	CD99P1	1.1075	0.00479071					5939	RBMS2	1.11	0.0413436
27429	HTRA2	1.10625	0.0204997					10955	SERINC3	1.2	0.0414578
3980	LIG3	1.105	0.000483727					5204	PFDN5	1.76625	0.041508
8165	AKAP1	1.105	0.0296218					7879	RAB7A	2.945	0.0417603
23140	ZZEF1	1.105	0.00753556					25901	CCDC28A	1.05625	0.0418241
8289	ARID1A	1.1025	0.0412365					29880	ALG5	1.365	0.0422673
51271	UBAP1	1.1025	0.0236803					84253	GARNL3	2.215	0.0422913
399761	BMS1P5	1.1025	0.0188819					26515	TIMM10B	1.17125	0.0423161
5595	MAPK3	1.1025	0.00515659					2531	KDSR	1.0575	0.0423536
79846	C7orf63	1.10125	0.00490839					9293	GPR52	2.02	0.042404
5457	POU4F1	1.10125	0.013257					220594	USP32P2	1.61625	0.0427179
768211	RELL1	1.1	0.0349732					6921	TCEB1	2.09625	0.0427909
5261	PHKG2	1.095	0.0175222					1209	CLPTM1	1.04375	0.0428455
128854	TSPY26P	1.095	0.0408811					23333	DPY19L1	2.10875	0.0431106
80230	RUFY1	1.09375	0.0281809					55186	SLC25A36	2.48625	0.0431977
219699	UNC5B	1.09375	0.0276038					92181	UBTD2	1.14	0.0432892
80823	BHLHB9	1.0925	0.00704804					84898	PLXDC2	2.38375	0.0433142
8443	GNPAT	1.09125	0.00837124					10640	EXOC5	1.235	0.0434835
347273	MURC	1.085	0.0174656					154661	RUNDC3B	1.53375	0.0436249
100506060	SMG1P7	1.085	0.0167035					284654	RSPO1	1.03625	0.0436573
6663	SOX10	1.085	0.0406759					328	APEX1	2.68625	0.0436678
65062	TMEM237	1.08375	0.0395184					79001	VKORC1	2.22625	0.0438196
25904	CNOT10	1.08375	0.00268784					221749	PXDC1	1.79875	0.0438637
84181	CHD6	1.0825	0.0173731					222389	BEND7	1.61875	0.0439279
285498	RNF212	1.08125	0.0150257					4064	CD180	1.2725	0.0440222
7763	ZFAND5	1.08125	0.0269567					4193	MDM2	1.30125	0.0442146
55930	MYO5C	1.08	0.00237234					84073	MYCBPAP	1.10125	0.0442878
645332	FAM86C2P	1.07625	0.0121103					91942	NDUFAF2	1.27125	0.0442932
9372	ZFYVE9	1.07375	0.029851					9737	GPRASP1	1.37875	0.0447906
9698	PUM1	1.07	0.0174333					51264	MRPL27	1.8925	0.0449147
5159	PDGFRB	1.06875	0.0460257					4602	MYB	2.61375	0.0449733
117155	CATSPER2	1.06875	0.0267519					197131	UBR1	1.61125	0.0450012
9126	SMC3	1.0675	0.045283					1512	CTSH	1.78375	0.0450042
8565	YARS	1.06625	0.0202318					7862	BRPF1	1.7025	0.045123
196513	DCP1B	1.06375	0.00524562					23023	TMCC1	1.84875	0.0451458
54841	BIVM	1.0625	0.0201837					646962	HRCT1	1.18125	0.0451468
5253	PHF2	1.06125	0.0146113					54529	ASNSD1	1.3475	0.0452197
9475	ROCK2	1.06	0.0440238					10057	ABCC5	1.3925	0.0454176
10897	YIF1A	1.05875	0.0123816					10588	MTHFS	1.32375	0.0455778
5739	PTGIR	1.05875	0.0388246					153657	TTC23L	1.38	0.0457152
7702	ZNF143	1.05625	0.00223066					8895	CPNE3	1.09875	0.0458072
375133	PI4KAP2	1.055	0.00552014					137872	ADHFE1	1.005	0.0460201
57633	LRRN1	1.05125	0.0293686					51368	TEX264	1.1825	0.0462304
144347	FAM101A	1.05125	0.0150399					51524	TMEM138	1.9975	0.0462528
80176	SPSB1	1.05	0.0142536					23229	ARHGEF9	1.63625	0.0462587
3280	HES1	1.05	0.0392088					131118	DNAJC19	1.78	0.046283
7571	ZNF23	1.04875	0.0154211					10188	TNK2	1.83375	0.0464346
145508	CEP128	1.0475	0.00349898					7991	TUSC3	2.5625	0.0465204
8677	STX10	1.0475	0.0140175					2052	EPHX1	2.49	0.0466493
54861	SNRK	1.045	0.0156773					23167	EFR3A	1.71875	0.0466841
26123	TCTN3	1.04375	0.00522537					64425	POLR1E	1.47	0.0468558
63897	HEATR6	1.0425	0.0431034					252983	STXBP4	1.6525	0.0469672
23028	KDM1A	1.04125	0.0326998					5922	RASA2	1.19625	0.0470669
55285	RBM41	1.04125	0.0197528					23270	TSPYL4	1.52125	0.0472392
6416	MAP2K4	1.04125	0.00526883					283643	C14orf80	1.09875	0.0472996
653635	WASH7P	1.04	0.00439744					6129	RPL7	2.5175	0.0474616
9632	SEC24C	1.03875	0.0396344					84276	NICN1	1.16625	0.0474987
126917	IFFO2	1.03625	0.0132792					5395	PMS2	1.89625	0.047747
8295	TRRAP	1.03375	0.0231283					5641	LGMN	2.64375	0.0477737
8883	NAE1	1.03375	0.00524089					839	CASP6	1.8675	0.0479091
23164	MPRIP	1.03375	0.016517					9577	BRE	1.44	0.0479268
2530	FUT8	1.0325	0.00911825					91408	BTF3L4	1.27	0.0481183
10667	FARS2	1.03	0.0151887					63892	THADA	1.8925	0.0481333
286187	PPP1R42	1.02875	0.0320854					29927	SEC61A1	1.0825	0.0485908
64766	S100PBP	1.0275	0.0292467					80319	CXXC4	1.3775	0.0486521
83860	TAF3	1.025	0.0181425					51283	BFAR	1.50125	0.0487134
284058	KANSL1	1.02375	0.0245652					79871	RPAP2	1.11	0.0487721
9820	CUL7	1.02125	0.0327763					51699	VPS29	2.1575	0.0488459
441295	OR2A9P	1.02125	0.047737					57149	LYRM1	2.04125	0.0491878
8398	PLA2G6	1.02125	0.0227234					10560	SLC19A2	1.27875	0.0492878
84861	KLHL22	1.02125	0.000572001					57659	ZBTB4	1.90625	0.0493858
79809	TTC21B	1.02	0.0402018					10325	RRAGB	1.8425	0.0495139
57724	EPG5	1.0175	0.00175274					51669	SARAF	2.295	0.0495679
2665	GDI2	1.015	0.0467927					51084	CRYL1	1.40125	0.049618
3614	IMPDH1	1.0125	0.0392195					63914	C6orf164	1.09375	0.0496769
23095	KIF1B	1.01125	0.0126458					9798	IST1	1.25625	0.0497175
374650	GOLGA6L5P	1.01125	0.000115326					153241	CEP120	1.1875	0.0498759
55239	OGFOD1	1.01125	0.00631717					100505503	RPS17L	2.5025	0.0499199
83693	HSDL1	1.01125	0.00424186					613210	DEFB136	1.30125	0.0499749
4670	HNRNPM	1.01	0.0210263
5045	FURIN	1.00875	0.0255786
147991	DPY19L3	1.00875	0.004905
22883	CLSTN1	1.0075	0.00746135
857	CAV1	1.005	0.0351728
115426	UHRF2	1.005	0.0472505
55728	N4BP2	1.0025	0.0410114
22853	LMTK2	1.0025	0.0329565
91663	MYADM	1.00125	0.0157556
54328	GPR173	1	0.0214227
9502	XAGE2	1	0.00379206
9889	ZBED4	1	0.007651

## Sheet: Supplementary Table 2
Supplementary Table 2: The GSEA results including NES and p-value of each pathway from the HALLMARK gene sets pre- and post-NACT.
GSEA_result pre-NACT							GSEA_result post-NACT
ID	enrichmentScore	NES	pvalue	p.adjust	qvalues	core_enrichment (Entrez.ID)	ID	enrichmentScore	NES	pvalue	p.adjust	qvalues	core_enrichment (Entrez.ID)
HALLMARK_EPITHELIAL_MESENCHYMAL_TRANSITION	0.574346	1.92257	0.00101937	0.0190913	0.0112538	2191/2026/1462/2199/59/3688/10631/6422/4323/3918/2335/10085/5376/7058/800/7049/50863/1303/633/6696/7168/4256/813/23705/1009/3956/25878/10398/10979/1634/7422/7057/6695/1893/1000/6443/6678/22795/5159/3908/4035/8038/4060/1842/7128/5806/3569/5351/79709/6424/1289/3673/4853/1314/3576/5654/3491/1278/6591/5054/9244/5270/26585/10516/5817/966/3624/1490/6387/4616/1293/2200/1601/131578/4313/56937/7070/115908…	HALLMARK_EPITHELIAL_MESENCHYMAL_TRANSITION	0.665658	2.01963	0.00100301	0.0100908	0.00616071	2191/1601/4060/5376/813/6678/3688/1634/10631/11010/1462/2335/25878/1303/633/3908/2199/6424/10979/6387/7058/4323/5396/5654/3956/4232/1009/6591/7057/22795/2200/7128/131578/4313/960/2014/5479/115908/6303/1293/4837/6696/966/7456/10085/64175/1893/30008/59/1277/3569/4982/5351/7424/7070/7049/871/3398/1278/1000/1314/6586/649/6443/4256/4853/5329/5999/1289
HALLMARK_UV_RESPONSE_DN	0.507084	1.65633	0.00104058	0.0190913	0.0112538	4131/4781/3480/11030/23229/657/5607/5376/91746/861/7049/5922/4233/5332/323/2274/23469/10395/5728/92/1859/5159/5578/857/493/27109/22828/10240/8455/8997/11099/4853/1432/9112/9975/3491/1278/307/6591/5054/10516/27032/23116/7799/4325/3488/4363/1601/4088	HALLMARK_UV_RESPONSE_DN	0.583278	1.7507	0.00100908	0.0100908	0.00616071	4131/1601/5376/6717/5607/323/4781/10401/6591/8613/861/11030/23229/4233/54468/1432/23576/1902/1843/10395/7410/6383/22828/23469/3480/7436/8455/1277/302/5922/594/7049/1278/4363/91746/4609/4493/3488/4853/5999/5728/1859/50937/11099/27032/3491/92/9975/10370/8829/8476/3382/5797
HALLMARK_TGF_BETA_SIGNALING	0.618164	1.82314	0.00114548	0.0190913	0.0112538	657/659/7057/4091/6711/6497/1499/5045/64750/324/51742/3460/7323/7046/1025/5054/2280/25937/6885/51592/7071/4088/56937/6498/57154	HALLMARK_OXIDATIVE_PHOSPHORYLATION	0.540602	1.64095	0.00100301	0.0100908	0.00616071	4697/4708/1345/9167/7381/7385/4695/521/9551/10884/1349/517/522/4694/8992/4259/10063/54704/2110/10312/26520/4712/4700/23530/5264/27089/1327/2879/4707/1337/5250/5435/1351/27429/513/64960/3945/4329/10651/1347/4976/22/6391/34/1431/2746/89941/8803/3313/3418/4191/1340/1350/4698/2271/3032/9296/4706/54884/3417/26517/26521/1537/1891/509/29088/4942/26519/6390/7417/2108/10449/6183/7386/788/3052/211/1743/471…
HALLMARK_HEDGEHOG_SIGNALING	0.626234	1.74005	0.00355872	0.0395413	0.0233086	1400/4627/4763/8828/8861/9289/5921/7422/1808	HALLMARK_PROTEIN_SECRETION	0.556484	1.6261	0.00205128	0.0128205	0.00782726	22872/8082/9522/967/10565/27236/8417/538/7251/3998/19/2803/259230/525/1182/8773/11079/23033/163/9525/3920/8675/2778/51552/10282/23041/8615/1176/667/10959/375/3382/8674/5066/8546/5538/10040/8774/286451
HALLMARK_MITOTIC_SPINDLE	0.445238	1.49001	0.00407747	0.0395413	0.0233086	2037/8470/23022/5922/4627/4763/4281/22920/9113/1453/5921/5311/8409/996/9462/6711/10048/9126/10565/7153/23095/324/81/10844/11214/4926/10160/8874/151987/25/6780/6249/4853/8936/9181/3831/51203/2035/1778/11064/10928/9700/64411/9564/127829/55755/8440/7414/5981/10435/3799/9266/8243/3619/4643/57580/9874/4650/23012/9585/3835/1739/9055/11135/382/29/9702/2317/23365/10006/85464/2316/163786/10018/23192/10163…	HALLMARK_MYC_TARGETS_V1	0.523806	1.58875	0.00100402	0.0100908	0.00616071	328/9045/5478/1207/5901/10576/6128/1973/6637/6418/5709/10399/1019/6599/10907/6633/821/3066/4175/5887/2107/22948/6188/6432/10971/6193/7531/5093/6629/5250/6175/52/1665/56910/7965/23450/51020/4609/6741/3178/6428/5984/3838/6426/3376/57819/3336/1503/7324/5690/6164/3326/6146/1176/26354/10549/5036/1017/3608/4869/7284/6194/7332/10236/4706/2079/5682/1537/26156/890/5245/7307/10575/7514/6632/9188/1854/5425/…
HALLMARK_ANGIOGENESIS	0.597658	1.66064	0.00474496	0.0395413	0.0233086	1462/10631/2260/6696/7422/4060/351/182	HALLMARK_ANGIOGENESIS	0.594179	1.57948	0.00911162	0.0379651	0.0231787	4060/2260/10631/1462/6696/7410/351
HALLMARK_UNFOLDED_PROTEIN_RESPONSE	0.454877	1.45917	0.00963597	0.0606796	0.035769	7280/55153/22872/7422/55802/10605/1938/6208/22926/10897/3434/4869/3376/9570/5073/5393/23404/1973/55062/5394/4800/8815/468/1662/27257/4850/25804/23644/3799/4848/2521/4801/7466/3309/9221/8602/57472/6464/10797/7534/11260/9451/5832/6734/11015	HALLMARK_TGF_BETA_SIGNALING	0.563104	1.56059	0.0044407	0.0302261	0.0184538	7323/7057/7046/51742/4086/659/2280/3398/387/90/57154/1499/5494/6497/1025/6498/25937/3460/2339/51592/7071/4088/4053/6574/6711
HALLMARK_CHOLESTEROL_HOMEOSTASIS	-0.381441	-1.52611	0.00970874	0.0606796	0.035769	1891/26270/6282/57761/2171/5641/114569/9415/2224/2222/6319/10682/467/6713/214/1119/1191/2194	HALLMARK_DNA_REPAIR	0.505509	1.51694	0.0020202	0.0128205	0.00782726	112/1603/4882/8178/2072/51292/7251/5436/10063/50484/30834/2879/5435/29927/8731/552900/10623/5439/5984/5438/6119/6118/55290/5982/23204/5983/23649/5440/203/51164/5437/1069/6881/4799/50808/2967/10959/5433/7157/2959/1716/9883/1643/10946/5432/2071/5429/8237/1854/5423/5985/64976/22916/25920/8086/6431/7372
HALLMARK_INTERFERON_ALPHA_RESPONSE	-0.437406	-1.84531	0.0128205	0.0712251	0.0419853	51667/1997/10964/54625/55008/6402/2766/2634/6373/135112/5684/4938/91543/6890/10437/5696/5721/841/9034/3600/129607/834/7453/51056/3659/9246/94240/3627/9111	HALLMARK_APICAL_SURFACE	0.5387	1.47326	0.0207877	0.0611404	0.0373278	79602/202/1946/351/7070/131566/5329/6376/51754/3315/8406/6517/2683
HALLMARK_MYC_TARGETS_V1	0.400003	1.33701	0.0143003	0.0715015	0.0421483	1503/5709/328/7027/10492/3192/9045/1964/51020/3178/10399/6128/22948/6599/4869/3608/3376/1665/5902/51690/5478/5690/7514/6426/26156/1973/3837/6240/1982/3066/10576/7324/6418/10236/6742/23435/2547/5984/5245/8662/6428/26121/23450/6432/9188/5036/7419/2107/790/10291/5683/5901/5093/6164/6059/5707/4999/9221/7307/6146/56910/11335/10575/11260/6193/4673/1207/4175	HALLMARK_APICAL_JUNCTION	0.481497	1.46154	0.00100301	0.0100908	0.00616071	1024/3688/2037/1462/10109/51148/1009/71/2200/4313/6251/942/7059/1432/6464/7410/8189/4763/257194/51776/4982/7070/1500/649/8976/947/1265/5728/3728/5216/4318/5921/3675/6376/143903/51754/2770/2593/9344/51474/8449/3680/8935/7414/26119/83700/9353/2683/55742/60412/51466/4628/10290/6850/10458/3383/5788/91624/3386/5010/1758/10398/1364/92359/81/10000/10487/2962/8503/3384/89/1001/1739/60/3667/103910/3636/30…
HALLMARK_HYPOXIA	0.397792	1.33099	0.0183486	0.0834028	0.0491638	2026/901/26118/54800/54206/4627/633/7511/2651/5209/1634/7422/2309/55139/1942/2131/5578/7128/857/8609/9380/3569/10397/1316/7360/10891/3516/4601/5066/1289/25824/5155/9215/538/3491/55577/8660/5054/8819/2597/56925/1356/4783/1490/6095/839/949/7043/55818	HALLMARK_COAGULATION	0.484056	1.44871	0.00708502	0.0354251	0.021628	6678/2335/5641/10404/5879/4323/1848/5654/710/1512/7057/2200/4313/1508/341/55970/3426/378/718/9948/649/2151/726/3920/824/22921/4318/1513/1519/928/8858/717/2/1465/1803/1191
HALLMARK_IL6_JAK_STAT3_SIGNALING	-0.344683	-1.42829	0.0215054	0.0896057	0.0528202	948/3563/2921/4050/6373/10563/7133/5781/952/5771/3659/3627/6772/3561/4283	HALLMARK_REACTIVE_OXYGEN_SPECIES_PATHWAY	0.524852	1.44432	0.0251092	0.0655903	0.0400446	7295/10542/57466/9943/2512/4700/475/2879/4363/2745/4257/10549/5524/4482/112398/9588
HALLMARK_PROTEIN_SECRETION	0.433563	1.36724	0.0367965	0.108225	0.0637959	8615/8082/23033/3998/22872/9341/1213/8546/163/525/10565/23095/7251/9570/22796/9525/5066/8773/8417/538/9276/10652/11311/8675/23041/1182/11079/10040/1315/372/51552/967	HALLMARK_HEME_METABOLISM	0.467706	1.41915	0.00200803	0.0128205	0.00782726	7029/8364/23039/665/4891/8867/6917/23568/4259/80148/56180/2309/54977/23112/7716/118/11163/1508/10171/23530/1182/55589/996/10181/682/718/66008/8850/25901/535/27429/3920/7390/6536/4329/50865/51092/8031/2145/3005/27102/23608/8301/8945/25796/9663/54165/360/55030/129642/5526/51218/6397/7150/115201/3321/8780/1371/51312/2039/7779/4140/63891/51573/5909/1497/2035/51257/57610/7001/3386
HALLMARK_ALLOGRAFT_REJECTION	-0.429216	-2.02102	0.047619	0.108225	0.0637959	3932/1230/1029/11222/822/6688/7040/717/3394/2268/5777/942/912/2213/7535/586/9466/3594/2149/8477/2833/602/3458/959/10261/5552/7098/4050/6356/7454/3133/5551/5579/894/2634/1234/3689/3603/6890/3111/10563/919/9450/5699/6357/729230/3600/3937/973/8807/50852/3001/3122/7453/917/2533/3117/914/6352/3662/2650/6772/1956/3109/1520/3561/10225/915/5788/4283	HALLMARK_ANDROGEN_RESPONSE	0.470538	1.37448	0.0195473	0.0610854	0.0372942	658/23585/54407/27347/8848/3998/563/6303/11057/9455/56172/11099/8031/567/3005/4094/7329/9218/5238/4189/5036/7520/10627/6675/1622/207/2683
HALLMARK_COMPLEMENT	-0.307082	-1.44593	0.047619	0.108225	0.0637959	5531/718/2153/4504/9732/4973/391/200316/1380/959/948/4321/714/7454/7980/6284/3303/5294/7941/1075/2625/629/4199/5321/1847/64145/5646/475/5641/3937/5265/834/1514/3001/51056/3659/6352/5341/1191/3003/1520/8942/341/6280/4057	HALLMARK_CHOLESTEROL_HOMEOSTASIS	0.474443	1.36195	0.0467775	0.111375	0.0679974	114569/5641/55902/58191/71/6282/51478/2990/132864/54206/5329/27346/1499/50814/928/2770/3958/2171/1891/308/1191/6311/20/134429
HALLMARK_ESTROGEN_RESPONSE_LATE	-0.331443	-1.574	0.047619	0.108225	0.0637959	57758/6337/3418/10761/7980/5121/3251/445/23596/9060/2444/2171/2288/27250/9455/26353/10439/7033/5265/2222/399665/10538/10112/2013/7494/60481/4299/120/3158/2289/7264/29887/27075/10551/9547/6280/4057	HALLMARK_ADIPOGENESIS	0.441822	1.34061	0.00803213	0.0365097	0.0222901	112/8082/79602/64859/901/8491/1349/4259/19/334/977/5264/5495/27089/56894/2879/1337/29103/718/26275/23788/1351/8404/7905/55037/9908/10124/6342/10140/6391/34/58472/1431/83549/6776/6888/4189/4191/4698/369/2632/84173/4706/27069/54884/3417/8780/1537/1891/130814/29088/376497/6390/2167/2053/10449/149685/5733/25813/51
HALLMARK_INFLAMMATORY_RESPONSE	-0.297624	-1.40436	0.047619	0.108225	0.0637959	4224/5724/7098/10507/6506/719/728/1236/6402/10135/6373/5025/1317/488/11047/1880/7133/4790/1902/2719/6361/9034/5029/3600/3937/8807/1536/5996/3587/3659/5142/6352/3627/9111/4283/3575	HALLMARK_HYPOXIA	0.437381	1.32763	0.0100301	0.0385773	0.0235524	1634/633/26118/7511/9380/1356/839/25824/901/2997/665/538/7128/7360/55076/55139/11015/2309/1843/6383/2597/58528/1316/7436/3569/3516/302/8819/54800/4493/2745/54206/5329/1289/1466/4502/2353/3491/3486/2239/10370/4015/51316/2632/2542/8406
HALLMARK_INTERFERON_GAMMA_RESPONSE	-0.38532	-1.81433	0.047619	0.108225	0.0637959	3394/5777/942/3437/5610/6737/6398/840/837/8743/55601/27348/80830/4261/196410/51735/4502/29126/10906/6375/10964/54625/55008/9934/10135/6373/3620/5684/91543/629/6890/7412/5321/10437/5696/2841/4790/5699/5721/841/25939/3600/129607/3937/952/834/3001/7453/51056/3123/5771/3587/3659/3117/10875/9246/5142/6352/94240/3627/57823/3662/9111/3106/6772/4283	HALLMARK_GLYCOLYSIS	0.432126	1.31168	0.0130391	0.0465683	0.0284312	7295/1634/1462/2132/10380/5478/839/2997/7360/55139/5516/4233/960/11015/6383/58528/2990/7436/5351/3597/10007/8819/8460/726/2745/11319/1289/5836/50814/6391/64132/4351/5834/3486/2239/25796/6888/4191/2805/10370/4200/50808/2542/3417/29926
HALLMARK_KRAS_SIGNALING_UP	-0.316885	-1.49209	0.047619	0.108225	0.0637959	7139/383/3237/83734/5121/719/10320/894/8808/9053/7185/79810/3080/3689/629/2745/1794/163590/208/5696/7133/5178/951/10457/7805/5175/3018/5284/3587/54677/330/6480/3627/2254/1520/3936/27075/3561/6590/3575	HALLMARK_APOPTOSIS	0.435963	1.3116	0.0262361	0.0655903	0.0400446	4060/1634/834/633/839/665/4313/960/6303/118/5534/2107/5058/7153/3569/351/2879/7049/6304/1387/914/5970/56172/2012/1499/3005/994/89941/1017/3315/3958/5914/5526/894/54884/3606/4170/1191/7417/7818/10017/10950/2232/9638/330/3456/5538
HALLMARK_MTORC1_SIGNALING	-0.406645	-1.91878	0.047619	0.108225	0.0637959	900/11151/5352/7184/57761/27071/5230/3099/441024/699/79602/3251/79071/6184/3329/5693/1718/10213/10135/1075/5163/3638/3939/5347/5684/5052/5718/488/3689/4199/3308/10437/2745/9695/81873/5641/9415/51109/6319/5464/6503/3336/10682/2539/7453/7494/2936/6713/10875/60481/1649/3417/8935/120/2729/8503	HALLMARK_MYC_TARGETS_V2	0.463474	1.29359	0.0923738	0.200813	0.122601	1019/10171/27340/10733/7965/4609/10196/27346/3336/26354/5036/81887/4869/5245/79711/6832/29078/8886/6573
HALLMARK_TNFA_SIGNALING_VIA_NFKB	-0.29336	-1.39314	0.047619	0.108225	0.0637959	2354/7185/10135/6373/24147/5271/6385/6890/1847/1880/4790/9120/9034/1846/1959/467/25816/3659/597/330/5142/6352/5341/80149/3627/51561/8942/3575	HALLMARK_P53_PATHWAY	0.425659	1.29157	0.0170683	0.0568942	0.0347354	4071/834/2052/51065/25873/57763/8848/3094/22824/10399/2309/6303/6948/10057/63874/55035/5268/4193/10560/351/10769/8673/29927/5889/3945/6667/10140/677/30836/203/10614/23654/2353/1509/23378/894/7157/54884/26471/975/9883/1643/5429/51768/2232
HALLMARK_XENOBIOTIC_METABOLISM	-0.288544	-1.36151	0.047619	0.108225	0.0637959	3273/3290/126/4502/7358/7498/50/1528/6999/948/2184/1891/435/383/225/3251/218/2618/384/9060/2937/1573/488/629/52/4355/5447/10728/1644/5699/1646/116285/2203/2936/54677/60481/3417/27329/217/22949/2729/8942	HALLMARK_COMPLEMENT	0.421098	1.2776	0.0251004	0.0655903	0.0400446	3988/2764/2335/5641/834/10404/1368/1604/4323/7511/1848/1356/2207/710/1512/5294/4322/7128/5516/5547/54704/1378/1508/966/341/475/3569/5290/808/3684/718/868/3920/5329
HALLMARK_FATTY_ACID_METABOLISM	-0.277573	-1.26652	0.0571429	0.124224	0.0732265	912/51166/51170/2182/1056/58476/4953/6281/126/7358/1962/50/6999/948/1891/7389/6296/10808/762/79602/218/364/3320/2819/1718/4683/3295/3939/5092/4199/10455/6611/51109/1374/30/2752/51703/3248/60481/3417/9246/3158/2180/2194/33	HALLMARK_MITOTIC_SPINDLE	0.40806	1.23817	0.062249	0.141475	0.0863742	2037/8409/10565/23022/1453/51174/9181/25/5108/4763/382/7153/5048/7531/996/5922/23332/10013/57580/9411/8976/4853/8440/121512/151987/9564/5921/7272/127829/89941/8470/10160/9874/667/163786/9344/8476/64411/4650/3799/11214/613/7414/9113/23012/11064/7074/10276/4281/4628/10006/29/394/201176/5311/8243/2035/4082/5981/22919/26271/396/81/2317/9793/9735/5829/23365/55704/25777/6711/11190/8874/22930/1739/55125…
HALLMARK_APICAL_JUNCTION	0.374618	1.25345	0.0601427	0.125297	0.0738595	2037/1462/3688/3918/51776/1024/1001/4627/10109/51148/4763/71/3033/51754/2886/1009/6251/6714/3675/10398/5921/5728/8189/4318/6376/3728/81/3673/1432/3265/83700/947/5089/8754/87/1500/5335/7414/3680/7073/3691/10290/5097/2962/2200/4313/8449/7070/10487/1739/7216/3636/1265/4982/10458/6810/30835/9379/6464/4267	HALLMARK_UNFOLDED_PROTEIN_RESPONSE	0.399972	1.17875	0.170408	0.340816	0.208077	22872/64859/6208/10130/1973/22926/11015/6464/7534/8815/9709/5393/23644/4850/3376/55153/9695/10897/5832/3313/4189/4869/58477/3799/9451/1938/6734/7280/8140/811/1978/60559/64924/10797/9652/54541/7466/1662
HALLMARK_ANDROGEN_RESPONSE	-0.300324	-1.27004	0.0921053	0.18315	0.107962	9218/9871/3685/51465/10257/5238/4189/5867/4117/25803/1718/9053/3638/11047/8031/55839/9455/6611/1622/27347/6319/25816/2936/3248/60481/22936/2289	HALLMARK_G2M_CHECKPOINT	0.381001	1.15607	0.151606	0.315847	0.192833	6421/3312/10772/3364/25/1432/1019/1164/6599/3609/5001/4175/5887/1946/7153/5048/51776/996/1112/10733/8819/91746/262/2130/4609/4212/904/4853/3091/6118/7486/3838/6760/6426/7272/23649/4502/994/10664/3226/7150/2146/3799/890/7468/30000/7514/6632/94239/8140/1871/4172/5926/5813/8243/4082/8452/26271/8451/1033/1111/4211
HALLMARK_IL2_STAT5_SIGNALING	-0.248007	-1.17777	0.0952381	0.18315	0.107962	79971/2184/3563/9173/3685/3099/4050/6335/7052/29851/894/6402/7185/5025/5745/1233/5583/7133/158219/8530/10538/22807/3587/7494/10875/399/214/3627/3662/58528/4907/4582/51284/1493/8320	HALLMARK_PEROXISOME	0.378828	1.10958	0.301538	0.519894	0.317409	9270/10512/25824/1022/6599/10057/7153/9525/83752/10478/51024/6342/1503/1742/3418/347734/1382/373156/1056/54884/3417/8799/1891/5243/2071/6477/2053/1962/51
HALLMARK_BILE_ACID_METABOLISM	-0.27541	-1.1775	0.102941	0.190632	0.112372	5194/3283/5827/3418/225/51268/1718/3295/367/6342/10350/10133/9415/10351/51703/54677/1734/3417/2180	HALLMARK_FATTY_ACID_METABOLISM	0.36603	1.09942	0.284125	0.507367	0.309761	658/328/2052/79602/9380/3956/51478/23710/2110/549/2752/594/26275/7390/131076/7358/50814/6391/34/8803/4191/874/5720/51166/2271/3032/1056/54884/3417/1371/1891/765/9588/57515/10449/1962/3052/51/5465/1743/1892/1666/728294/37
HALLMARK_PEROXISOME	-0.276372	-1.17634	0.109589	0.195695	0.115357	6820/51170/2182/1056/2100/1962/5194/1891/3418/225/1718/5830/7367/3295/5828/5052/6342/10455/51109/2224/30/51703/60481/3417/1382/10512/2180/1381	HALLMARK_ALLOGRAFT_REJECTION	0.361979	1.09835	0.259036	0.498146	0.304132	23166/1615/8560/1984/6203/4528/1435/6170/972/942/6133/961/3566/3122/3569/7096/7070/914/7321/6688/3091/1230/4318/567/3117/3135/6892/92/6223/4869/8672/9450/894/717/3606/3551/3689/3460/207/958/3455/10006/10261/6059/3383/5788/50852/1520
HALLMARK_G2M_CHECKPOINT	0.358918	1.20114	0.118247	0.203874	0.120178	6421/51776/3609/91746/7027/5933/3925/10492/3192/3364/6760/996/9462/3980/5558/2130/10772/10733/6599/7153/7486/9252/4211/4926/7514/25/6426/3837/4853/1432/2146/10664/8452/51203/8819/4331/5976/9700/1112/1946/3799/8243/3619/4088/22823/9585/994/51659/3835/9055/4928	HALLMARK_IL2_STAT5_SIGNALING	0.359573	1.09096	0.272818	0.505219	0.30845	1326/1291/6484/1435/960/942/3566/3682/23710/6696/5451/58528/659/1316/1893/3480/5167/2879/2151/4609/5325/9261/5025/10124/200734/2012/130589/152007/9910/23191/3655/2983/57231/8829/51284/894/26018/10875/962/975/5243/79971/8784/7074/5732/6335/23075/196/81848/177/5359/7372/7133/10410/307/4135/974/51429
HALLMARK_ADIPOGENESIS	-0.244385	-1.15071	0.142857	0.230415	0.135823	1647/149685/9131/51129/5236/1031/84919/6453/7351/128338/130814/8322/3977/5264/3952/10935/718/539/80273/1580/11176/50/948/2184/1891/29088/4706/8884/79602/79071/4189/2878/6623/28512/56922/1337/4199/284/6342/58472/1537/5447/27250/5168/7086/26353/4698/483/4958/7905/27089/3417/217/10162/2167/33	HALLMARK_HEDGEHOG_SIGNALING	0.407466	1.08315	0.374715	0.604379	0.36899	1400/8828/4763/7436/7070/5921/1808/7088/8829/4897
HALLMARK_OXIDATIVE_PHOSPHORYLATION	-0.244496	-1.15367	0.142857	0.230415	0.135823	518/840/56993/5264/10935/539/80273/4707/4700/2108/50/1528/6834/1891/10651/29088/5250/22/4706/3418/521/92609/3939/56898/2395/10063/1337/4967/9296/1537/5447/4704/9377/514/506/4709/51606/4698/4696/1374/30/4724/481/27089/38/54205/3417	HALLMARK_PI3K_AKT_MTOR_SIGNALING	0.365738	1.0752	0.362615	0.604358	0.368977	5879/5571/7323/23236/10094/51135/1460/1019/7249/5599/5308/7132/6773/4615/5728/5216/3709/9630/10451/1017/375/8737/207/10392/1845/4803/1072/7074
HALLMARK_REACTIVE_OXYGEN_SPECIES_PATHWAY	-0.327056	-1.20499	0.168919	0.263936	0.155583	2878/5052/2745/2512/475/26034/2539/2936/51022/2729	HALLMARK_ESTROGEN_RESPONSE_EARLY	0.32927	0.999017	0.509529	0.749705	0.457715	4886/4602/6387/89797/55540/960/744/10395/3983/26509/11057/10560/3480/3280/4609/4681/23389/347733/64699/10140/2296/5420/2353/9467/10160/6566/360/5914/26018/6990/115/2683/55191/1997/7074/8140/60436/51195/9094/56994/2697/3487/5655/8645/374/23030/7071/6840/29107/2317/8800/56944/949/21/7466/3705/3880/3717/9620/10125/56603/4137/771/8839
HALLMARK_NOTCH_SIGNALING	0.440168	1.18152	0.238622	0.361549	0.213124	84441/8324/3280/5578/2648/182/4853/8819/51107/23220/26508/595/10402	HALLMARK_ESTROGEN_RESPONSE_LATE	0.32759	0.993921	0.517553	0.749705	0.457715	4886/1345/4602/6387/4232/55540/960/22824/23650/26509/11057/7153/1363/3398/10733/9455/4681/7358/64699/10140/2296/2353/928/3418/10160/12/6566/2013/2171/6990/5121/7074/5733/8140/10950/51195/56994/3487/5655/8645/374/2030/5265/51083/29107/2317/949/21/7466/3705/3880/10610/3717/56603/4137/7054/771/8839
HALLMARK_E2F_TARGETS	0.327538	1.0948	0.28907	0.425104	0.250587	51747/1503/3609/5395/3925/10492/3364/10111/5558/253714/10733/9126/4436/10714/7153/5902/7514/5983/6426/2146/10664/5411/84844/9924/9972/3070/57122/9700/4361/2547/5511/7465/5981/5036/8243/7374/9125/5901/994/3835/4999/146909/9221/204/54556/64858/23165/10797/4172/4292/203068/11340/4673	HALLMARK_IL6_JAK_STAT3_SIGNALING	0.342456	0.99271	0.524793	0.749705	0.457715	1326/1435/55540/960/10254/3566/3953/7132/6773/4615/3569/3597/1230/23765/928/6774/3588/5770/5320/2/9180/3460
HALLMARK_MYOGENESIS	0.318284	1.06515	0.341488	0.48784	0.287569	89797/3688/688/4205/165/10580/8082/4627/10014/9463/3983/6678/3490/11156/3908/8038/7170/2049/351/4629/9215/487/7249/6300/203/6840/25937/3691/10290/2702/3756/4616/1293/7125/10468/7004/6764/1410/1292/1140/786/4621/1266/5091/10278/23654/1384/4638/6876/1760/4151/8912/6709/5621/375790/140465/1277/22924	HALLMARK_KRAS_SIGNALING_UP	0.3242	0.983716	0.549197	0.757082	0.462219	2119/55365/9358/1848/5396/2207/7128/6696/163590/1363/3398/51193/6304/50856/54462/23268/131566/2745/8404/5329/55107/56172/3728/4318/2012/23643/9935/3237/7851/3486/9910/10418/1240/12/1636/951/8829/2115/894/8808/28959/25960/3689/5243/4803/5121/51704/81602/1438/330/51012/55339/4214/1520/80380/5593
HALLMARK_WNT_BETA_CATENIN_SIGNALING	0.37075	1.04666	0.405917	0.548701	0.323445	10014/79885/1499/2648/3516/182/3066/23385/8650/6868/51176/9794	HALLMARK_MYOGENESIS	0.322558	0.978734	0.560241	0.757082	0.462219	6678/9463/3688/8082/3908/688/89797/2049/7249/1293/5569/3983/1277/351/4209/165/2170/203/23654/3486/10468/5348/4205/25937/3316/115/11156/1191/4303/2548/3479/22808/10290/7170/375790
HALLMARK_SPERMATOGENESIS	0.320101	1.04045	0.40733	0.548701	0.323445	419/54558/10254/5414/3595/1459/9063/79882/10124/10038/5261/64395/22824/7091/5884/2146/83700/55342/29118/2571/5984	HALLMARK_INTERFERON_ALPHA_RESPONSE	0.322368	0.941993	0.641026	0.821784	0.50172	834/81894/1435/972/961/3566/219285/103/6773/11274/3107/567/3431/10581/79132/5720/23424/10964
HALLMARK_DNA_REPAIR	0.316001	1.03349	0.417012	0.548701	0.323445	7372/5422/55290/4882/51251/192670/65109/10946/5439/5423/51292/5429/10714/7251/2071/112/5983/30834/5436/9883/9013/51160/53343/203/5435/5984/4090/5430/5432/2962/5980/9533/10302/9328	HALLMARK_PANCREAS_BETA_CELLS	0.346634	0.933465	0.606704	0.798295	0.48738	6812/6727/3630/9935/58477/1803/6726/26610/10000
HALLMARK_P53_PATHWAY	0.307599	1.0294	0.431193	0.552811	0.325868	5268/4071/5784/10057/25873/8722/2309/3094/10399/5429/57763/55035/3625/22824/10397/351/25898/6667/3265/26471/317/578/10140/9883/203/127544/3945/3691/49856/5900/10628/51065/91/7508/10458/50619/6768/8626/8841/6206/23654/2052/11202/3872/1969/4193	HALLMARK_TNFA_SIGNALING_VIA_NFKB	0.303304	0.920236	0.717151	0.821784	0.50172	1326/10209/4929/1435/9322/8613/7128/8848/960/1958/2354/19/1843/6303/7130/9516/1316/10725/3569/3280/10769/3398/329/4609/5329/5970/5187/6776/2353/3491/23529/1959/3606/5271/4170/3460/2683/490/7280/9334
HALLMARK_COAGULATION	0.309059	1.00678	0.471757	0.589697	0.347611	4323/2335/1465/7057/5327/10404/2151/6678/5627/4318/5879/4035/5045/8609/710/824/3673/5550/55970/5155/5654/5054/8754/1848/1512/9948/928	HALLMARK_INFLAMMATORY_RESPONSE	0.302364	0.917801	0.72317	0.821784	0.50172	23166/6717/4481/1604/4323/1435/4891/4233/2014/3566/1902/10630/19/7130/3696/1316/3569/7096/1317/4609/131566/5329/5970/3091/5025/5739/27032/6376/6892/92/1240
HALLMARK_ESTROGEN_RESPONSE_EARLY	0.293156	0.981312	0.535168	0.652644	0.384717	347733/4602/89797/3480/56994/9862/2274/8645/3983/10395/2296/3866/8165/3280/26018/60436/3625/375449/9846/10160/4681/28966/54020/22996/3880/57419/4603/3898/4886/10140/64699/6840/744/3717/5914/949/6387/4137/7071/55540/9620/6990/26509/25800	HALLMARK_INTERFERON_GAMMA_RESPONSE	0.301506	0.914855	0.721888	0.821784	0.50172	834/8082/6717/8869/81894/710/972/7128/942/3566/7130/219285/103/6773/4615/3569/8673/11274/3091/10124/567/25939/3117/3135/4502/6892/5690/3431/10581/79132/1240/26053/5720/6774/23424/5770/10964/10875/8737/10392/958/3455/3437/84166/84888/3383/57169/5359/64761/5683/6398/10797/10410/9961
HALLMARK_HEME_METABOLISM	0.286734	0.95957	0.588175	0.700209	0.412755	66008/2145/3043/8945/6536/7716/23112/23530/55034/23039/2309/80148/56895/996/27429/10181/51312/4601/8867/4891/55589/26020/8780/51646/8364/2035/3321/119/2057/4259/1182/25901/535/4329/23568/118/7029/8301/57610/23365/9958/10098/5091/7145/26130/5886/9541/54498/6006/81689/3920/25796/54977/80853/27102/26502/896/1371	HALLMARK_SPERMATOGENESIS	0.303569	0.907345	0.716312	0.821784	0.50172	54558/419/79882/10254/4889/8100/22824/5414/673/5037/64395/9063/3306/5984/10124/7272/23411/5884/6888/8161/1636/254263/2146/11073/83700/3595
HALLMARK_GLYCOLYSIS	0.269518	0.901792	0.720693	0.824879	0.486245	2026/1462/4233/9862/3925/1634/7422/2132/55139/2131/2530/4200/22796/5351/7360/5478/4601/4351/5066/1289/8660/11319/9276/10380/8819/8460/64132/839/26035/1824/10776/5834/726/10461/2239/22976/5516/960/3309/7295/5768/2817/5091/2542/2990/11015/2582/2683/4190/5214/8912/6383/25796/6888/2673/375790/6781	HALLMARK_E2F_TARGETS	0.290293	0.880483	0.786145	0.865173	0.528211	51747/3364/5901/5395/5511/1019/1164/3609/4175/7153/9125/10733/1434/4609/5889/6119/6118/3838/5982/6426/5983/1503/23649/6470/10527/994/7083/4292/10111/10549/5036/10664/7884/2146/7157/8726/79733/7514/64858/1854/5425/54556/4172/54962/4361/8243/5981/5411/10797/1033/23468/1111/9918
HALLMARK_PI3K_AKT_MTOR_SIGNALING	0.277033	0.881644	0.725894	0.824879	0.486245	23236/5308/5599/4803/1213/5728/3709/5879/3265/7323/5563/5571/2932/10392/7249/31/1460/51295/5335/4087/6885/1072/6195	HALLMARK_UV_RESPONSE_UP	0.290217	0.872272	0.79596	0.865173	0.528211	2052/10482/4323/2354/1983/3569/6184/682/262/3306/7009/5984/3134/1742/2353/5437/1280/1181/116138/1017/360/5789/9296/5504/3337/5243/4916/9188/10950/211/8804/5538/3383/6415
HALLMARK_UV_RESPONSE_UP	0.267026	0.877433	0.745605	0.82845	0.488349	4916/2026/4323/3192/9818/10482/1983/2744/988/10038/5045/3569/116138/1968/578/10652/5334/5984/9392/9129/9188/997/3134/725/1181	HALLMARK_WNT_BETA_CATENIN_SIGNALING	0.312888	0.847908	0.720133	0.821784	0.50172	3066/3516/23385/4609/1499/2770/10023/894/7157
HALLMARK_MYC_TARGETS_V2	0.272827	0.806373	0.794489	0.854371	0.503629	10733/4869/51388/5245/5036/9064/7374/27346/23160/64216/6949/81887/9221/11335/51154	HALLMARK_MTORC1_SIGNALING	0.27185	0.825179	0.869609	0.925116	0.564808	5641/79602/5478/7323/6917/5693/2597/821/2107/7436/6184/871/9521/2745/3488/10622/23760/27346/8615/5464/3336/9695/54843/3313/928/908/2805/26227/2632/2542/3417/10875/8935/3689/26471/4802/8140/2232/134429/6533/811/10197/31/10097/5719/10797/10987/54541/2936/5211/8503/81873/1595/5033/4048/4860/4171/9136/2058/1719/8624/7296/11151/8894
HALLMARK_APOPTOSIS	0.25735	0.845651	0.803109	0.854371	0.503629	2026/7049/633/1387/1634/5327/5534/5159/1499/4060/7153/857/3569/351/2012/5970/5058/835/56616/7465/10410/56172/5914/839/2107/4616/4313/51330/10628/118/994	HALLMARK_XENOBIOTIC_METABOLISM	0.256536	0.778693	0.91675	0.954948	0.583021	57447/2052/10237/839/6747/23710/2110/7132/957/3398/52/1725/8460/7009/1573/283537/3728/7358/27346/9564/9054/4502/10717/9663/54884/3417/28959/1891/6580/65018/3479/51128/51/211/6533/5909/4522/10857/3487/5950/51380/8310/1969/2936/2571/3931
HALLMARK_PANCREAS_BETA_CELLS	-0.182205	-0.656478	0.975309	1	0.589474	7421/4760/5078/57586/26610/3170/4825/5063/6833/28972/3375/1113/5080/9935/3651/58477/10590/2641	HALLMARK_NOTCH_SIGNALING	0.203087	0.526111	0.981417	1	0.610526	3280/8819/4853/84441/8324/51107/2648/408/23291/8321/23220/4854/7855
HALLMARK_APICAL_SURFACE	0.190841	0.540199	0.9821	1	0.589474	51754/6376/23054/351/1946/7070/131566/5329	HALLMARK_KRAS_SIGNALING_DN	0.170201	0.516439	1	1	0.610526	658/57089/50832/4929/51226/525/727/80303/8786/5795/1280/6498/2593/10964
HALLMARK_KRAS_SIGNALING_DN	-0.18016	-0.848305	1	1	0.589474	4210/55506/27076/7441/6336/5077/7051/10686/7704/83714/6620/7038/1838/5409/8647/4842/3963/8823/5133/11254/3852/727/79696/10777/1950/3699/7356/7252/1237/5737/26548/79917/57118/5324/6262/3458/959/54847/1358/7781/56848/5650/10753/9746/56154/10964/51384/7367/6474/3567/91543/1360/57016/54842/54855/9073	HALLMARK_BILE_ACID_METABOLISM	-0.213381	-1.01741	0.409091	0.639205	0.390251	64241/8443/366/5191/5194/5947/55825/8431/6258/24/6579/2638/51268/1734/83594/8856/225/1718/27284/10133/11001/367/3283/3295/10351/3422/51703/9415
NES: normalized enrichment score; NACT, neoadjuvant chemotherapy.

## Sheet: Supplementary table 3
Supplementary table 3: The result of Venn diagram making up with the amounts and the genes of the intersections among the four modules.
Names of group	total	Entrez.ID
M1.1 M1.2 post-NACT pre-NACT	7	6387
		5654
		1293
		4060
		4313
		6424
		1634
M1.1 post-NACT pre-NACT	23	1289
		7049
		2191
		6591
		2200
		7057
		1303
		22795
		1278
		3908
		5396
		5351
		633
		6678
		3688
		1462
		7070
		7058
		1893
		10979
		59
		1009
		25878
M1.2 post-NACT pre-NACT	9	813
		1000
		115908
		1601
		3569
		2199
		7128
		5376
		131578
M1.1 M1.2 pre-NACT	2	5054
		3491
M1.1 M1.2 post-NACT	6	4837
		2014
		7456
		6303
		11010
		5479
post-NACT pre-NACT	11	10085
		6696
		4323
		4853
		966
		1314
		4256
		10631
		3956
		2335
		6443
M1.1 pre-NACT	6	5159
		1842
		10516
		5270
		1490
		10398
M1.2 pre-NACT	3	51330
		23705
		6695
M1.1 post-NACT	9	649
		4232
		7424
		1277
		871
		30008
		64175
		5999
		6586
M1.2 post-NACT	4	4982
		5329
		3398
		960
M1.1 M1.2	4376	57573
		6712
		10309
		2634
		347517
		9638
		2203
		6358
		337879
		91373
		56903
		2994
		84275
		167465
		80099
		158521
		26831
		399833
		1259
		9985
		4902
		1203
		51109
		161142
		26279
		200403
		23574
		440077
		91862
		493829
		139135
		27158
		255330
		23171
		155066
		170591
		80032
		79095
		8091
		6101
		80381
		284383
		55055
		8100
		9873
		2845
		64777
		147700
		122258
		121273
		55365
		389333
		8941
		113802
		285877
		152404
		160728
		23659
		414899
		80168
		2034
		131669
		5671
		10344
		54504
		54414
		84618
		25996
		554235
		8649
		9401
		7087
		5105
		442444
		338398
		50814
		9935
		64593
		9543
		343702
		2590
		100506540
		57666
		5337
		286133
		168537
		23626
		9117
		474384
		205564
		6207
		80199
		256815
		6744
		1510
		54708
		220047
		79192
		26353
		100131816
		9955
		386653
		10665
		788
		93986
		6335
		1843
		84315
		6502
		1294
		440957
		6345
		7111
		51382
		10544
		100287664
		131450
		10713
		84886
		164127
		112770
		56924
		203286
		6281
		132851
		89
		63971
		114327
		157927
		1675
		64332
		642
		50859
		26164
		6290
		83882
		8668
		85479
		147920
		5592
		776
		728215
		26266
		5625
		181
		728062
		29763
		348840
		51129
		26748
		2543
		142891
		5224
		5129
		6660
		2791
		51293
		282991
		29114
		144535
		26228
		27115
		3563
		135152
		79625
		65982
		2953
		4058
		8745
		3489
		8884
		3628
		7262
		222255
		51188
		440519
		23235
		54674
		342357
		79295
		260436
		5077
		3747
		6060
		283375
		116842
		78991
		401236
		146325
		7439
		100128927
		8352
		6192
		10287
		317751
		84667
		56478
		3775
		9622
		3780
		80320
		100507203
		401612
		3270
		317716
		319
		735
		10201
		6921
		26829
		91543
		1133
		23439
		1118
		26257
		114786
		55672
		390616
		336
		360030
		2532
		3817
		134288
		548313
		219348
		51013
		3687
		5450
		64224
		64897
		3208
		6706
		8976
		122664
		2289
		3283
		401285
		54363
		1030
		54490
		4632
		2021
		570
		3123
		55638
		3549
		389874
		22829
		55640
		134353
		5301
		257202
		253559
		137797
		340120
		55626
		4956
		440563
		727837
		3808
		27315
		654463
		6609
		23506
		653282
		79959
		147323
		4969
		84851
		23281
		27128
		3487
		4329
		926
		60492
		645037
		728405
		6137
		127703
		100133171
		9480
		158983
		57569
		284433
		10507
		400950
		10990
		7222
		284352
		388323
		3823
		4360
		3975
		353514
		28960
		55851
		1056
		644314
		23682
		51471
		3108
		257240
		4285
		645432
		1473
		881
		129293
		200150
		139716
		7033
		1734
		7042
		222643
		7484
		2254
		644
		7494
		60386
		83982
		79901
		3646
		440068
		342900
		1902
		646892
		84986
		10766
		4357
		23418
		389152
		90441
		26517
		5173
		83590
		353132
		219654
		3171
		427
		5121
		139818
		4735
		51379
		57534
		131177
		4499
		283971
		26526
		11092
		146862
		150771
		51082
		3222
		1435
		404636
		399726
		161753
		58527
		84002
		84503
		26247
		440712
		401024
		138803
		6923
		6556
		259307
		388021
		26191
		3361
		7781
		114824
		1409
		7260
		22820
		9175
		25841
		635
		3603
		619189
		341880
		64499
		23398
		10457
		1437
		727830
		140701
		2517
		127124
		219482
		1600
		22802
		9717
		56311
		55611
		285989
		25797
		149069
		54778
		100133234
		389206
		63948
		116412
		10826
		11218
		26503
		3340
		389558
		11190
		199
		85407
		4606
		11178
		441519
		139804
		6507
		29121
		63941
		4991
		2912
		131
		93010
		440896
		26355
		6708
		378951
		85446
		26030
		11045
		9781
		8826
		57213
		56649
		7259
		6650
		2879
		57130
		2077
		10266
		5588
		157285
		8468
		143379
		3084
		8934
		8502
		256710
		220107
		84525
		1121
		114984
		10974
		30011
		7105
		4790
		53336
		440359
		374378
		79635
		6453
		136647
		81539
		728318
		4110
		2009
		58480
		2627
		352954
		100101116
		643988
		128344
		55890
		1041
		728137
		677765
		84530
		79873
		343472
		9022
		5133
		6205
		84817
		81282
		345
		9184
		442245
		343069
		952
		4498
		90485
		26064
		644096
		283985
		25822
		653437
		90332
		116349
		26291
		140873
		3705
		55009
		55240
		4016
		256329
		25903
		168391
		57198
		200909
		7453
		100144748
		2620
		170370
		391723
		81466
		339229
		122786
		141
		1230
		2793
		10911
		55894
		5865
		3590
		6171
		2894
		3
		201626
		7802
		3269
		2632
		25998
		151195
		54922
		6361
		338879
		3670
		7391
		149708
		78988
		4909
		144321
		646262
		9906
		129831
		10285
		27250
		56547
		333929
		285231
		64784
		9131
		2290
		1123
		81300
		23767
		93664
		29800
		25946
		5630
		677681
		2889
		83876
		284391
		387914
		5213
		10273
		79097
		119180
		27181
		259197
		90011
		221002
		84992
		284069
		8517
		4830
		284532
		11157
		114571
		6500
		51015
		57642
		347527
		762
		23223
		91662
		4619
		84317
		389857
		150572
		9138
		373861
		2205
		132228
		8292
		54831
		219428
		252995
		1260
		8013
		138429
		386676
		1026
		130589
		285180
		55902
		4674
		255119
		23178
		51619
		124817
		137814
		2023
		1669
		245938
		79570
		1959
		114760
		55200
		132204
		79148
		11167
		645683
		22985
		55816
		256714
		9246
		339559
		8139
		222537
		2210
		26539
		646
		8530
		4005
		10282
		221935
		55600
		8999
		10235
		55357
		8342
		6407
		7993
		222611
		83394
		26253
		33
		196374
		51061
		7535
		29844
		8808
		23308
		221416
		63891
		4990
		57126
		85413
		139604
		26716
		3827
		5157
		2992
		4942
		220992
		259292
		23743
		57631
		3859
		7288
		6165
		197342
		1577
		55911
		886
		151306
		2835
		3568
		255783
		283316
		54825
		320
		55504
		223082
		819
		100506650
		51507
		205147
		5095
		133418
		285533
		1378
		57113
		116985
		161742
		3797
		7389
		2495
		79736
		5899
		7267
		729359
		2050
		3815
		11081
		729355
		151613
		3630
		196483
		643418
		6999
		10046
		64327
		51480
		391475
		29942
		5573
		51439
		761
		576
		124221
		2334
		1512
		80095
		10241
		117532
		4014
		84952
		5003
		7711
		151887
		11132
		197358
		3263
		84672
		192286
		389376
		83483
		1687
		7404
		377007
		3142
		7138
		10595
		432369
		714
		7293
		92999
		219431
		120400
		83604
		283461
		201780
		8484
		2717
		51268
		148223
		5697
		401
		221908
		186
		84223
		5260
		642006
		359710
		3561
		340152
		613227
		53828
		29087
		8195
		7001
		2904
		342666
		159119
		337970
		2475
		220081
		219557
		10199
		56605
		651302
		55262
		165545
		7941
		2697
		64375
		343263
		9547
		65980
		2675
		22900
		283
		160857
		83786
		84830
		7040
		57096
		283129
		286410
		864
		90843
		126259
		116843
		79946
		1674
		26339
		145258
		6002
		57600
		8309
		91653
		64167
		201475
		4212
		389690
		154865
		6451
		203069
		4821
		51170
		8361
		1145
		84133
		339416
		3697
		57590
		6953
		6812
		284361
		64843
		2046
		391013
		23270
		6302
		8858
		116123
		133690
		950
		122060
		100008586
		1466
		6297
		3744
		117159
		3854
		1607
		10369
		119694
		10438
		579
		84435
		26298
		90874
		100526772
		131377
		1628
		9173
		6011
		340562
		169841
		51348
		26273
		144195
		168620
		55530
		1407
		150221
		139741
		390226
		84893
		100288520
		84448
		5788
		3788
		9503
		123876
		140545
		51255
		3201
		8320
		81562
		54458
		414332
		404785
		10257
		4041
		7047
		56203
		119032
		284729
		3806
		93474
		574029
		646405
		89870
		26047
		391002
		415117
		56952
		57103
		27146
		285679
		83597
		286464
		3437
		126
		388946
		400120
		767846
		66002
		55905
		9468
		8406
		345630
		7326
		1856
		1804
		22868
		100127889
		57595
		121551
		317754
		84074
		115572
		10865
		5493
		1005
		9610
		387640
		112703
		5872
		728932
		5265
		339487
		57097
		10069
		340024
		2653
		257101
		5143
		51366
		921
		440400
		29993
		5360
		2788
		64798
		6405
		128553
		60485
		3040
		374
		1306
		9535
		221188
		10917
		9745
		1392
		1080
		2819
		132625
		9120
		140767
		90655
		100431172
		23127
		92104
		8314
		93380
		10640
		146850
		29941
		6861
		259283
		6870
		6517
		5037
		642987
		728130
		115207
		9673
		5139
		5341
		79639
		165100
		5641
		8228
		55602
		26492
		6039
		8689
		5178
		388284
		219958
		23428
		2128
		121278
		10813
		51333
		246176
		80723
		7905
		7755
		29895
		50944
		5168
		84153
		91828
		161514
		29882
		51602
		65243
		2914
		51054
		478
		6767
		60673
		100506243
		124783
		3512
		63874
		9104
		154091
		9915
		343
		56261
		245915
		92259
		5738
		9262
		129446
		23024
		60672
		100506840
		284716
		84803
		7079
		138724
		23495
		149699
		64839
		58503
		10877
		57552
		375316
		30062
		153129
		139425
		23498
		494188
		142686
		10634
		55367
		55093
		26693
		5732
		56681
		7291
		163590
		56
		10171
		23217
		127495
		54875
		6623
		6819
		5552
		84966
		30
		93978
		7988
		3038
		27240
		8674
		127254
		150763
		57135
		11342
		2861
		389852
		51179
		89872
		50855
		158724
		124995
		158830
		11276
		285141
		11180
		339768
		463
		113091
		81621
		6691
		1109
		653162
		54796
		285555
		390064
		7712
		79884
		57002
		55957
		26533
		152831
		23480
		4671
		253725
		5880
		401152
		55325
		91893
		55014
		120586
		64854
		84935
		140881
		55353
		387751
		541468
		2676
		84176
		59286
		25771
		117196
		11254
		126695
		6688
		441459
		54511
		133022
		10553
		3311
		81786
		7278
		8328
		84142
		84717
		389840
		3274
		51280
		85865
		132989
		3802
		8284
		6867
		29070
		23250
		161198
		84502
		100507436
		10246
		1539
		27288
		29937
		6702
		3727
		11103
		5358
		10950
		6440
		7052
		100128496
		57228
		6770
		26740
		4779
		1442
		1743
		131544
		27091
		4109
		389124
		3205
		4995
		144124
		728619
		138065
		7546
		347541
		204010
		5292
		8968
		100507421
		212
		9753
		645700
		399814
		3384
		6934
		5108
		201562
		1305
		5365
		8870
		9951
		477
		157378
		8973
		341568
		766
		25879
		10178
		349633
		90293
		11231
		196410
		3726
		10815
		387
		8836
		257
		951
		58492
		113730
		7580
		79628
		2865
		727905
		401335
		11055
		254122
		56662
		84679
		126299
		148870
		2642
		2354
		5867
		130951
		6871
		8933
		349149
		286223
		8569
		390245
		440051
		5274
		100130827
		728622
		9744
		284415
		84766
		55150
		57599
		90120
		202
		474148
		8542
		130013
		154
		5320
		152138
		2801
		283152
		51460
		10078
		84701
		83460
		57659
		3292
		100132074
		340419
		554
		55273
		552
		730394
		3766
		83697
		84062
		8557
		245932
		1350
		399823
		7739
		441314
		390326
		89884
		619279
		10234
		147699
		147906
		1504
		57795
		79589
		474383
		79905
		83640
		374907
		3932
		84233
		117153
		1316
		10023
		6259
		51752
		6878
		284390
		6839
		892
		81697
		128602
		92140
		537
		10761
		55554
		9801
		3119
		221895
		7152
		51065
		220001
		987
		100874333
		10469
		26211
		140848
		1340
		247
		59067
		5125
		4739
		1142
		129080
		4708
		5584
		5551
		25992
		27330
		10780
		10906
		80150
		345274
		390191
		133619
		8368
		170067
		10437
		11247
		55506
		29802
		3754
		5283
		57336
		8658
		4586
		150000
		126208
		6646
		118429
		5229
		6620
		138241
		56964
		79960
		8294
		360200
		129804
		9861
		51252
		22983
		149461
		388503
		55276
		2593
		10540
		144809
		338949
		54920
		4644
		390059
		9900
		57217
		13
		7942
		83478
		1514
		1647
		597
		9844
		387911
		25884
		32
		280657
		7080
		55779
		3484
		91695
		390260
		29935
		1506
		63982
		163351
		26049
		6522
		64922
		859
		4284
		401509
		2890
		57786
		51805
		1876
		4605
		26095
		283229
		51174
		83417
		7450
		403313
		151963
		6910
		503497
		170685
		8601
		1040
		284076
		140801
		100885850
		1419
		862
		341
		100170218
		6232
		51643
		60401
		79908
		10351
		6369
		29124
		23263
		4747
		414763
		83401
		6496
		9083
		94
		79814
		94235
		23081
		148545
		117144
		10007
		25885
		1621
		7681
		10752
		79772
		256536
		1556
		10184
		284116
		4593
		7320
		27254
		11025
		23764
		8639
		92106
		30816
		57461
		2072
		9189
		5733
		152078
		139599
		7553
		5790
		93343
		7464
		2100
		140832
		9024
		146852
		79339
		80745
		83639
		57127
		142684
		8507
		65990
		284274
		51225
		100049587
		2854
		7140
		4886
		1038
		85320
		1777
		5910
		84270
		26240
		57477
		79838
		3240
		50613
		9588
		10396
		83452
		25864
		347252
		23201
		1806
		7369
		1370
		80110
		9733
		51005
		23553
		79981
		3131
		85437
		6263
		9758
		10365
		55022
		79891
		944
		1113
		957
		9560
		3996
		4543
		10959
		10216
		386757
		165257
		23732
		494197
		643680
		28992
		91768
		2828
		5013
		4753
		23174
		115584
		90957
		3308
		28999
		55593
		390992
		56157
		200132
		6000
		84984
		50856
		51533
		10536
		100137047
		219493
		4435
		441509
		51699
		388591
		50865
		912
		60496
		161176
		79345
		285282
		79831
		51616
		80319
		6887
		127435
		55568
		10875
		22921
		2921
		161502
		246181
		23399
		80763
		1521
		155006
		5420
		1082
		1066
		79712
		64409
		9179
		145814
		221393
		113130
		3099
		51475
		55351
		4152
		125228
		83873
		51393
		222545
		26136
		219956
		283189
		56676
		9421
		118487
		339291
		482
		256148
		7429
		150223
		23043
		28986
		55766
		51621
		388015
		151242
		5996
		1124
		284428
		199720
		100130742
		7490
		154796
		282775
		9507
		653583
		55753
		7328
		1729
		6674
		122481
		51608
		8350
		54491
		6928
		9937
		81567
		1031
		253190
		10411
		140738
		5455
		101059918
		6657
		325
		7263
		55363
		100130958
		64098
		6188
		6649
		218
		5918
		5473
		255626
		283685
		80817
		162699
		202309
		55750
		2339
		6865
		7177
		98
		146845
		114761
		100129460
		125981
		4921
		83692
		84677
		586
		57232
		92400
		64859
		54437
		55821
		480
		643036
		85417
		23245
		50486
		114336
		23464
		201633
		5912
		10267
		254863
		154664
		120224
		1440
		148479
		375519
		5896
		26260
		2966
		51705
		55660
		4330
		10893
		51762
		56133
		337974
		343071
		7133
		54360
		493901
		10991
		130497
		284111
		5271
		100129480
		9256
		29995
		5004
		6352
		54957
		22828
		4173
		1646
		3010
		744
		140258
		65061
		144501
		932
		57624
		84103
		2996
		389400
		6614
		5370
		645121
		3958
		9515
		2192
		390067
		6944
		5972
		64852
		143884
		80833
		285704
		50717
		29072
		51702
		1582
		2900
		360132
		10661
		55652
		91942
		7157
		23635
		3809
		815
		6442
		5743
		79714
		11341
		26090
		27350
		1174
		393
		256380
		255324
		1128
		84705
		644511
		6835
		203447
		341947
		51236
		387597
		4135
		10647
		10015
		55545
		343563
		404672
		126668
		84654
		143279
		408187
		286023
		57732
		23275
		440307
		64396
		64101
		257068
		9085
		8829
		64111
		23395
		79087
		6511
		5222
		57509
		1670
		6170
		30009
		51023
		284615
		84616
		84808
		27185
		65121
		91607
		23338
		374868
		255104
		81610
		4355
		6713
		10226
		79987
		403315
		728269
		360205
		9185
		91252
		84940
		3547
		115
		2319
		4878
		7570
		23314
		10786
		100302650
		155051
		201965
		27127
		9742
		441056
		80243
		389816
		167681
		5090
		10682
		151556
		24147
		3492
		79603
		8832
		239
		100130519
		10349
		642597
		117194
		387509
		11244
		340654
		7855
		9046
		196993
		255374
		81577
		340267
		51550
		2535
		220832
		55203
		25890
		728936
		389058
		130540
		83667
		441194
		132200
		389384
		146956
		9863
		81501
		26287
		115350
		339403
		11163
		340260
		64221
		10307
		57597
		55211
		151449
		284541
		9637
		83549
		285622
		10343
		91137
		144245
		23532
		6677
		958
		285905
		83442
		8512
		8536
		116362
		79072
		25959
		100151683
		284207
		3329
		386672
		9626
		84687
		401190
		2300
		391191
		3357
		1955
		63933
		8985
		727936
		5516
		727910
		654817
		10841
		27236
		391634
[truncated: 11,541 more rows]
